# Supplementary material
Source: PubMed Central journal article supplement (PMC4690987)

## SUPPORTING INFORMATION

### Synthesis, Binding and Antiviral Properties of Potent Core-Extended Naphthalene Diimide Targeting the HIV-1 Long Terminal Repeat Promoter G-quadruplexes

Rosalba Perrone,<sup>†,§</sup> Filippo Doria,<sup>‡,§</sup> Elena Butovskaya,<sup>†,§</sup> Ilaria Frasson,<sup>†</sup> Silvia Botti,<sup>‡</sup> Matteo Scalabrin,<sup>†</sup> Sara Lago,<sup>†</sup> Vincenzo Grande,<sup>‡</sup> Matteo Nadai,<sup>†</sup> Mauro Freccero,<sup>\*,‡</sup> and Sara N. Richter<sup>\*,†</sup>

<sup>†</sup>Department of Molecular Medicine, University of Padua, via Gabelli 63, 35121 Padua, Italy

<sup>‡</sup>Department of Chemistry, University of Pavia, V.le Taramelli 10, 27100 Pavia, Italy

#### Table of content

|                                                                                                                     |         |
|---------------------------------------------------------------------------------------------------------------------|---------|
| <b>Table S1.</b> List of oligonucleotides used in this study.                                                       | S2      |
| <b>Table S2.</b> C-exNDIs $\Delta T_m$ values obtained in the FRET melting assay.                                   | S3      |
| <b>Table S3.</b> Cartesian coordinates of a prototype <b>c-exNDI</b>                                                | S4-S5   |
| <b>Figure S1.</b> Size comparison between a) the NDI and b) <b>c-exNDI</b> cores                                    | S6      |
| <b>Figure S2:</b> CD analysis of LTR-III, LTR-IV and hTel G4 oligonucleotides in the absence/presence of <b>2</b> . | S7-S9   |
| <b>Figure S3.</b> CD analysis of G4-folded oligonucleotides in MS buffer conditions.                                | S10     |
| <b>Figure S4.</b> ESI/MS competition analysis.                                                                      | S11     |
| <b>Figure S5.</b> ESI/MS analysis of <b>2</b> binding stoichiometry to LTR-III G4.                                  | S12     |
| <b>Figure S6.</b> SPR analysis of <b>2</b> binding affinity to LTR-IV and hTel G4s.                                 | S13     |
| <b>Figure S7.</b> Assessment of <b>2</b> cell entry by microscopy.                                                  | S14     |
| <br>                                                                                                                |         |
| HPLC PURITY DATA                                                                                                    | S15-S1  |
| <sup>1</sup> H- and <sup>13</sup> C-NMR spectra of the compounds <b>1</b> , <b>5</b> , <b>6</b> and <b>7</b>        | S20-S29 |

**Table S1.** Oligonucleotides used in this study

| Application                      | Name              | Sequence 5'-3'                                                             |
|----------------------------------|-------------------|----------------------------------------------------------------------------|
| FRET assay                       | LTR-III           | <i>FAM</i> -TGGGAGGCGTGGCCTGGGCGGGACTGGGGT- <i>TAMRA</i>                   |
|                                  | LTR-IV            | <i>FAM</i> -TGGGCGGGACTGGGGAGTGGT- <i>TAMRA</i>                            |
|                                  | F21T              | <i>FAM</i> -GGGTTAGGGTTAGGGTTAGGG- <i>TAMRA</i>                            |
|                                  | dsDNA             | <i>FAM</i> -CTATAGCGCGCTATAG- <i>TAMRA</i>                                 |
| CD and MS assays                 | LTR-III           | GGGAGGCGTGGCCTGGGCGGGACTGGGG                                               |
|                                  | LTRIV             | TGGGCGGGACTGGGGAGTGGT                                                      |
|                                  | hTel              | GGGTTAGGGTTAGGGTTAGGG                                                      |
|                                  | c-kit2            | CGGGCGGGCGCGAGGGAGGGG                                                      |
|                                  | c-myc             | TGGGGAGGGTGGGGAGGGTGGGGGAAGG                                               |
| <i>Taq</i> polymerase stop assay | <i>Taq</i> Primer | GGCAAAAAGCAGCTGCTTATATGCAG                                                 |
|                                  | No G4             | TTGTCGTTAAAGTCTGACTGCGAGCTCTCAGATCCTGCAT<br>ATAAGCAGCTGCTTTTTGCC           |
|                                  | hTel              | TTTTTGGGTTAGGGTTAGGGTTAGGGTTTTTCTGCATATA<br>AGCAGCTGCTTTTTGCC              |
|                                  | LTR III           | TTTTTGGGAGGCGTGGCCTGGGCGGGACTGGGGAGTGGT<br>TTTTTCTGCATATAAGCAGCTGCTTTTTGCC |
|                                  | LTR IV            | TTTTTGGGCGGGACTGGGGAGTGGTTTTTCTGCATATAAG<br>CAGCTGCTTTTTGCC                |

*FAM*: 6-carboxyfluorescein, *TAMRA*: 6-carboxy-tetramethylrhodamine

**Table S2. C-exNDIs  $\Delta T_m$  values obtained in the FRET melting assay.** Equimolar amounts of the compounds were added to each FAM (6-carboxyfluorescein) 5'-end- and TAMRA (6-carboxy-tetramethylrhodamine) 3'-end-labelled oligonucleotide (0.25  $\mu$ M) folded in the lithium cacodylate buffer supplemented with potassium (100 mM).

| <b>c-exNDIs</b> | <b>LTR-III</b> | <b>LTR-IV</b>  | <b>hTel</b>   | <b>dsDNA</b>  |
|-----------------|----------------|----------------|---------------|---------------|
| <b>2</b>        | 10.5 $\pm$ 0.1 | 11.7 $\pm$ 0.6 | 6.0 $\pm$ 0.1 | 1.5 $\pm$ 0.1 |
| <b>3</b>        | 7.0 $\pm$ 0.7  | 10.3 $\pm$ 1.1 | 3.5 $\pm$ 0.7 | 1.6 $\pm$ 0.4 |
| <b>4</b>        | 7.0 $\pm$ 0.7  | 12.0 $\pm$ 1.7 | 5.3 $\pm$ 1.1 | 1.6 $\pm$ 0.5 |
| <b>5</b>        | 2.5 $\pm$ 0.1  | 5.0 $\pm$ 0.1  | 2.0 $\pm$ 0.1 | 1.1 $\pm$ 0.6 |
| <b>6</b>        | 5.0 $\pm$ 0.7  | 6.3 $\pm$ 0.6  | 4.2 $\pm$ 0.3 | 1.8 $\pm$ 0.6 |
| <b>7</b>        | 3.7 $\pm$ 1.0  | 4.7 $\pm$ 0.6  | 3.0 $\pm$ 0.1 | 1.5 $\pm$ 0.1 |
| <b>8</b>        | 1.5 $\pm$ 0.1  | 3.0 $\pm$ 0.1  | 1.5 $\pm$ 0.7 | 1.1 $\pm$ 0.6 |
| <b>9</b>        | 1.2 $\pm$ 1.1  | 3.0 $\pm$ 1.0  | 0.5 $\pm$ 0.7 | 0.5 $\pm$ 0.1 |
| <b>10</b>       | 12.4 $\pm$ 0.1 | 16.0 $\pm$ 1.7 | 8.5 $\pm$ 0.6 | 4.1 $\pm$ 0.6 |
| <b>11</b>       | 5.5 $\pm$ 0.1  | 11.7 $\pm$ 1.2 | 3.8 $\pm$ 0.3 | 1.5 $\pm$ 0.6 |

**Table S2.** Cartesian coordinates of the **c-exNDI** core (Scheme 1, R<sub>2</sub>=CH<sub>3</sub>, R<sub>3</sub>=Y=H) optimised at B3LYP/6-31+G(d,p) level of theory, in gas phase, using Gaussian 09, Revision B.01 software package.

| Center Number | Atomic Number | Atomic Type | Coordinates (Angstroms) |           |           |
|---------------|---------------|-------------|-------------------------|-----------|-----------|
|               |               |             | X                       | Y         | Z         |
| 1             | 6             | 0           | -0.217963               | -2.890097 | -0.000065 |
| 2             | 6             | 0           | -0.210573               | -1.429193 | -0.000147 |
| 3             | 6             | 0           | -1.450603               | -0.710875 | -0.000178 |
| 4             | 6             | 0           | -2.679294               | -1.396967 | -0.000121 |
| 5             | 6             | 0           | -2.701691               | -2.872757 | -0.000130 |
| 6             | 6             | 0           | 1.002582                | -0.725637 | -0.000164 |
| 7             | 6             | 0           | -1.450606               | 0.710875  | -0.000252 |
| 8             | 6             | 0           | -0.210578               | 1.429200  | -0.000288 |
| 9             | 6             | 0           | 1.002583                | 0.725650  | -0.000206 |
| 10            | 6             | 0           | -0.217978               | 2.890104  | -0.000228 |
| 11            | 6             | 0           | -2.701709               | 2.872749  | -0.000221 |
| 12            | 6             | 0           | -2.679301               | 1.396959  | -0.000203 |
| 13            | 6             | 0           | -3.893181               | 0.694469  | -0.000050 |
| 14            | 6             | 0           | -3.893178               | -0.694485 | -0.000060 |
| 15            | 1             | 0           | -4.818044               | 1.260047  | 0.000021  |
| 16            | 8             | 0           | -3.735670               | 3.532525  | 0.000780  |
| 17            | 8             | 0           | 0.829008                | 3.567832  | 0.000517  |
| 18            | 8             | 0           | -3.735646               | -3.532542 | -0.000082 |
| 19            | 8             | 0           | 0.829030                | -3.567819 | -0.000101 |
| 20            | 7             | 0           | -1.458036               | -3.528911 | 0.000183  |
| 21            | 7             | 0           | -1.458059               | 3.528909  | -0.000463 |
| 22            | 6             | 0           | -1.503535               | -4.998420 | 0.000408  |
| 23            | 6             | 0           | -1.503570               | 4.998420  | -0.000160 |
| 24            | 1             | 0           | -2.044109               | 5.346589  | -0.882700 |
| 25            | 1             | 0           | -0.481647               | 5.367348  | -0.004398 |
| 26            | 1             | 0           | -2.042154               | -5.346457 | 0.884197  |
| 27            | 1             | 0           | -0.481601               | -5.367338 | 0.002629  |
| 28            | 1             | 0           | -2.036402               | 5.346903  | 0.887019  |
| 29            | 1             | 0           | -2.038288               | -5.347048 | -0.885535 |
| 30            | 1             | 0           | 2.141728                | -2.381023 | 0.000014  |
| 31            | 1             | 0           | 2.141735                | 2.381033  | -0.000273 |
| 32            | 6             | 0           | 3.440486                | 0.703687  | -0.000125 |
| 33            | 6             | 0           | 3.440486                | -0.703676 | -0.000075 |
| 34            | 6             | 0           | 4.650709                | 1.403085  | -0.000087 |
| 35            | 1             | 0           | 4.639964                | 2.489027  | -0.000115 |
| 36            | 6             | 0           | 4.650706                | -1.403079 | -0.000011 |
| 37            | 1             | 0           | 4.639958                | -2.489020 | -0.000004 |
| 38            | 6             | 0           | 5.856171                | -0.699850 | 0.000007  |
| 39            | 1             | 0           | 6.794033                | -1.245446 | 0.000026  |
| 40            | 6             | 0           | 5.856173                | 0.699852  | -0.000019 |
| 41            | 1             | 0           | 6.794035                | 1.245449  | 0.000036  |
| 42            | 1             | 0           | -4.818040               | -1.260064 | -0.000019 |
| 43            | 7             | 0           | 2.211187                | -1.356421 | -0.000088 |
| 44            | 7             | 0           | 2.211189                | 1.356433  | -0.000195 |

Gaussian 09, Revision B.01, M. J. Frisch, G. W. Trucks, H. B. Schlegel, G. E. Scuseria, M. A. Robb, J. R. Cheeseman, G. Scalmani, V. Barone, B. Mennucci, G. A. Petersson, H. Nakatsuji, M. Caricato, X. Li, H. P. Hratchian, A. F. Izmaylov, J. Bloino, G. Zheng, J. L. Sonnenberg, M. Hada, M. Ehara, K. Toyota, R. Fukuda, J. Hasegawa, M. Ishida, T. Nakajima, Y. Honda, O. Kitao, H. Nakai, T. Vreven, J. A. Montgomery, Jr., J. E. Peralta, F. Ogliaro, M. Bearpark, J. J. Heyd, E. Brothers, K. N. Kudin, V. N. Staroverov, T. Keith, R. Kobayashi, J. Normand, K. Raghavachari, A.

Rendell, J. C. Burant, S. S. Iyengar, J. Tomasi, M. Cossi, N. Rega, J. M. Millam, M. Klene, J. E. Knox, J. B. Cross, V. Bakken, C. Adamo, J. Jaramillo, R. Gomperts, R. E. Stratmann, O. Yazyev, A. J. Austin, R. Cammi, C. Pomelli, J. W. Ochterski, R. L. Martin, K. Morokuma, V. G. Zakrzewski, G. A. Voth, P. Salvador, J. J. Dannenberg, S. Dapprich, A. D. Daniels, O. Farkas, J. B. Foresman, J. V. Ortiz, J. Cioslowski, and D. J. Fox, Gaussian, Inc., Wallingford CT, 2010.

**Figure S1.** Size comparison between a) the **NDI** and b) **c-exNDI** cores. The size of the NDI, as well as the G4 size [reported in c) and d)], have been evaluated from the crystal structure of the intramolecular human telomeric DNA G-quadruplex bound by the di-substituted NDI BMSG-SH-3 (3SC8.pdb, from Reference: Collie, G.W., Promontorio, R., Hampel, S.M., Micco, M., Neidle, S., Parkinson, G.N. Structural basis for telomeric G-quadruplex targeting by naphthalene diimide ligands. *J. Am. Chem. Soc.* **2012**, *134*, 2723-2731). The size of the **c-exNDI** core was evaluated from DFT calculations in gas phase, at B3LYP/6-31+G(d,p) level of theory. Overlap of the c) **NDI** and d) **c-exNDI** cores to the intramolecular human telomeric DNA G-quartet, for an estimation of the ligand-quartet overlap extension.

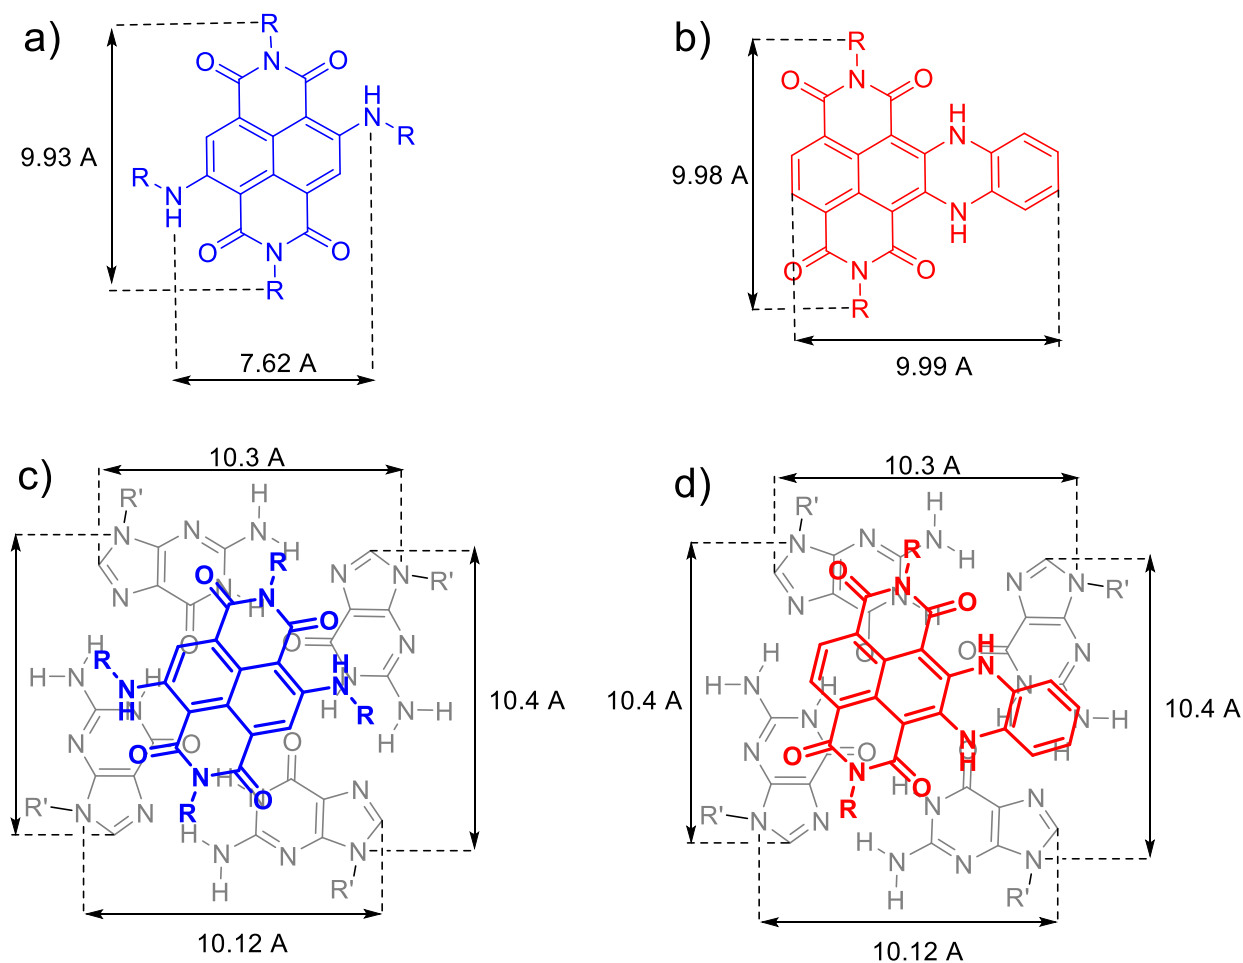

**Figure S2.** CD analysis of LTR-III (A), LTR-IV (B) and hTel (C) G4 oligonucleotides in the absence (lower panels) and in the presence of compound **2** (upper panels). The left panels show CD spectra variation in function of the temperature; arrows indicate the spectral change from low to high temperatures. The right panels show the molar ellipticity at the peak wavelength as a function of the temperature.

**A**

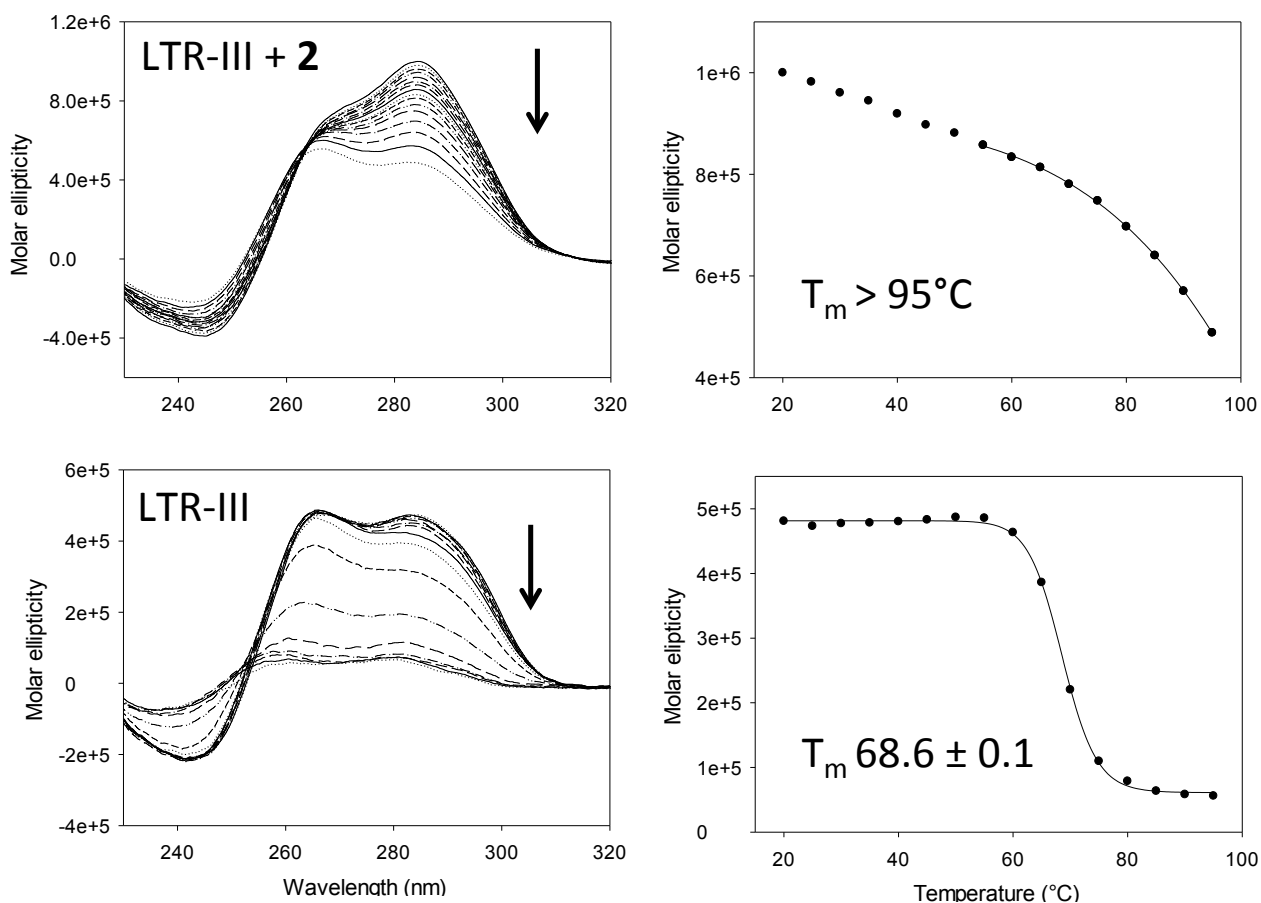

**B**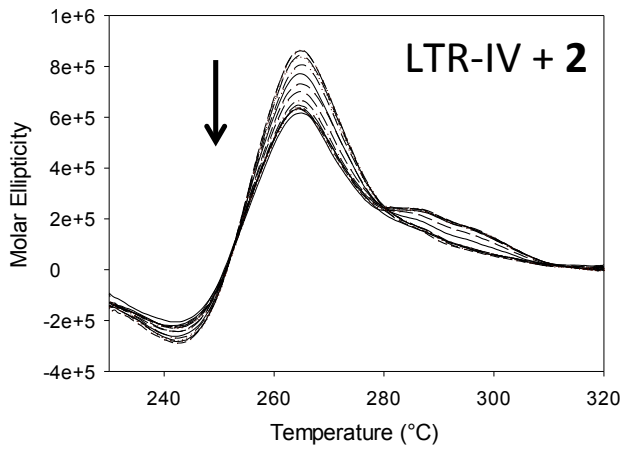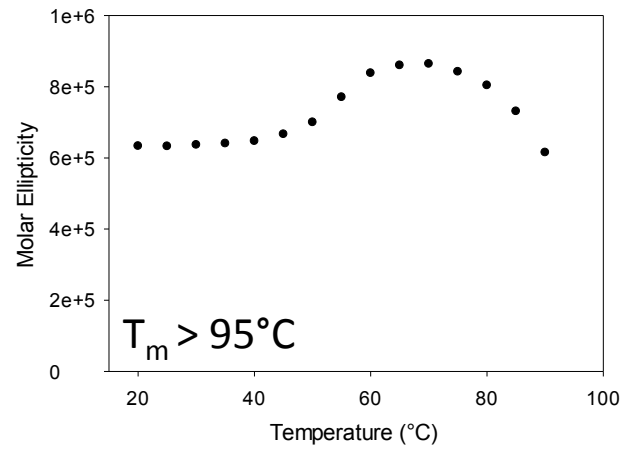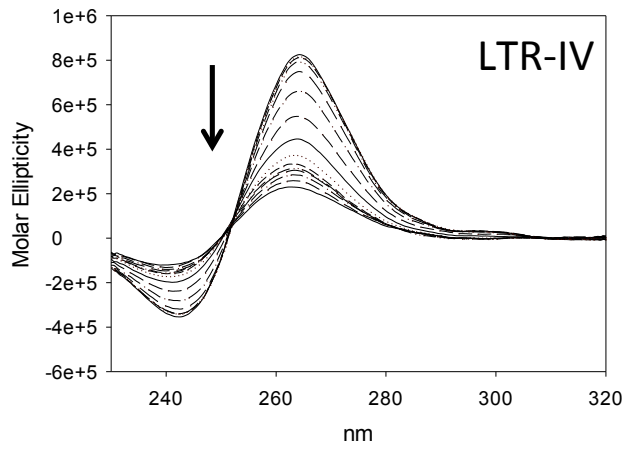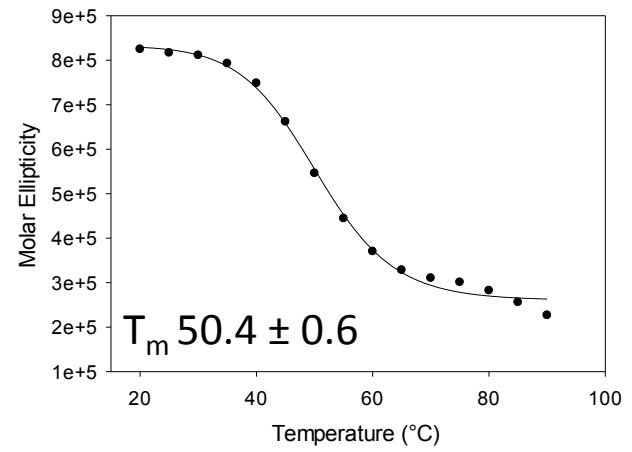



C

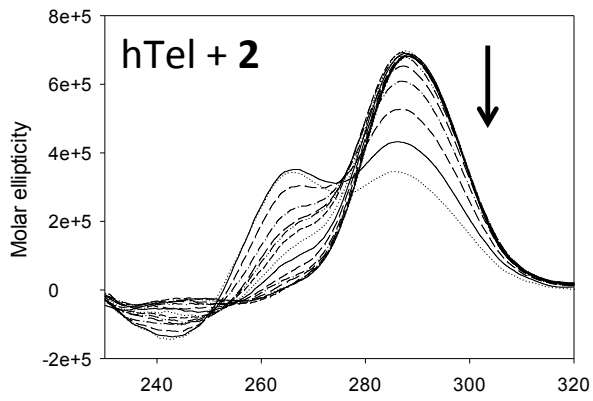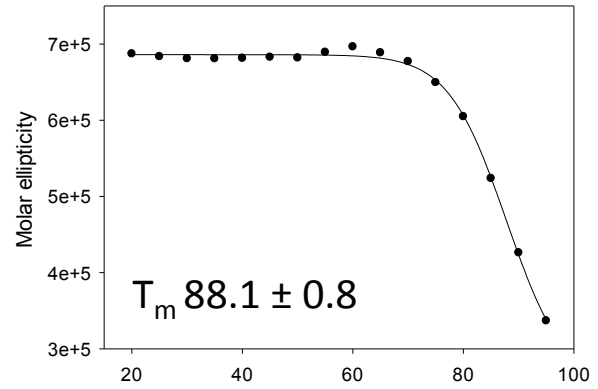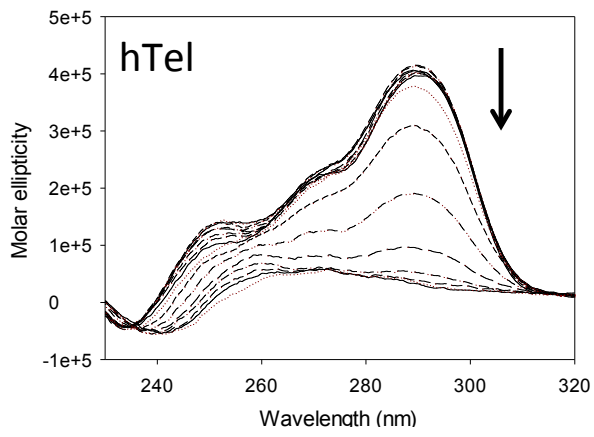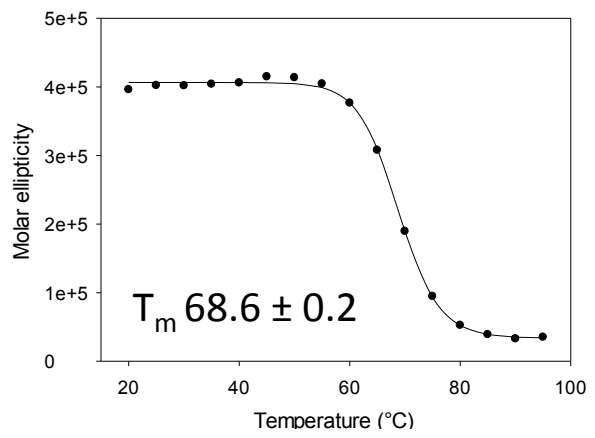

**Figure S3.** CD analysis of G4-folded oligonucleotides in MS buffer conditions.

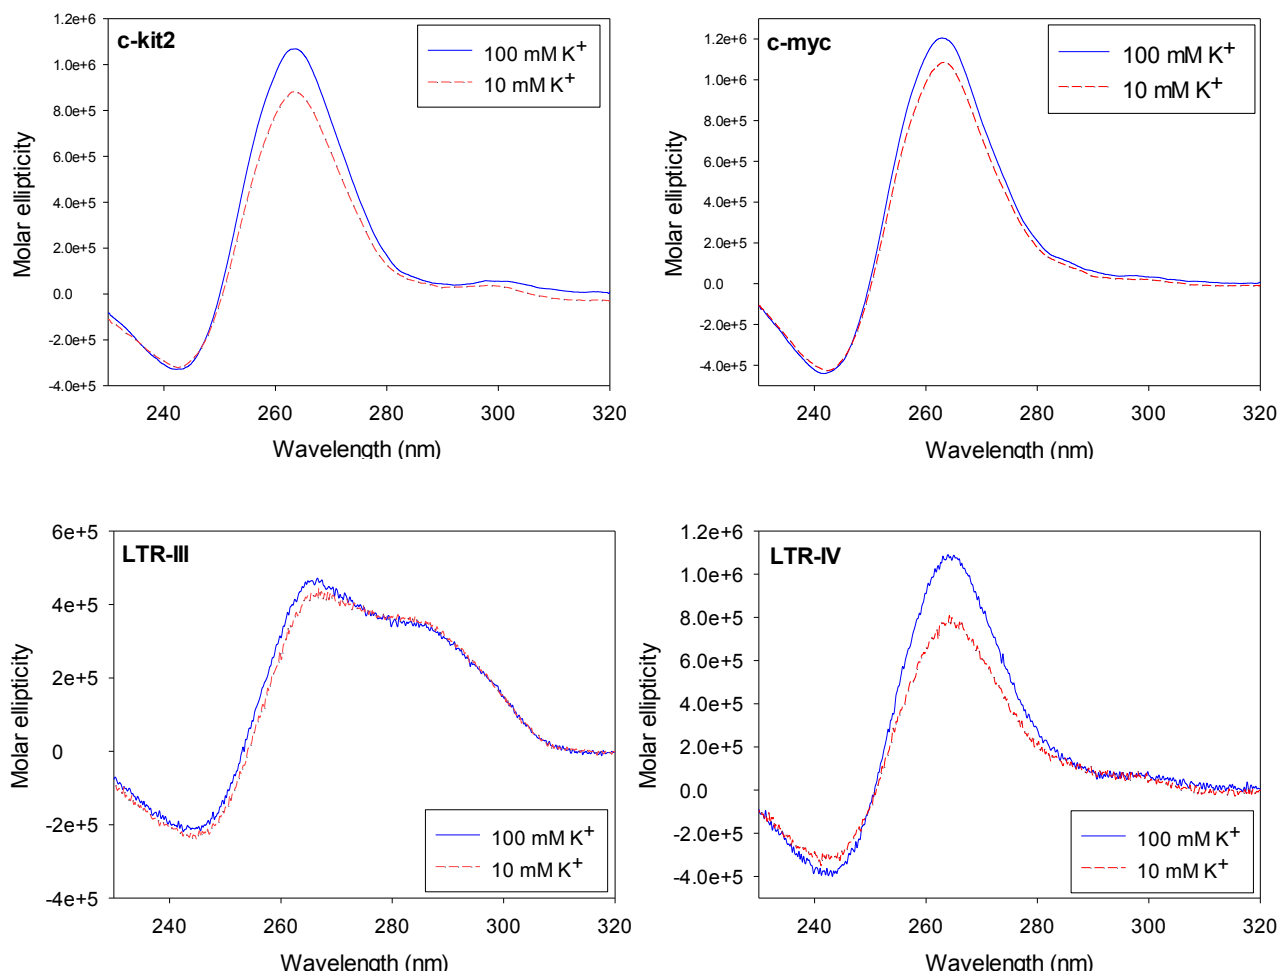

**Figure S4.** ESI/MS competition analysis. Equimolar amounts of LTR-III/hTel (A), LTR-IV/hTel (B), LTR-III/LTR-IV (C) were incubated with 2-fold excess of **2** (left panels) or **4** (right panels) and analysed by ESI/MS. The identity of  $m/z$  signals is shown above each signal. RI stands for relative intensity.

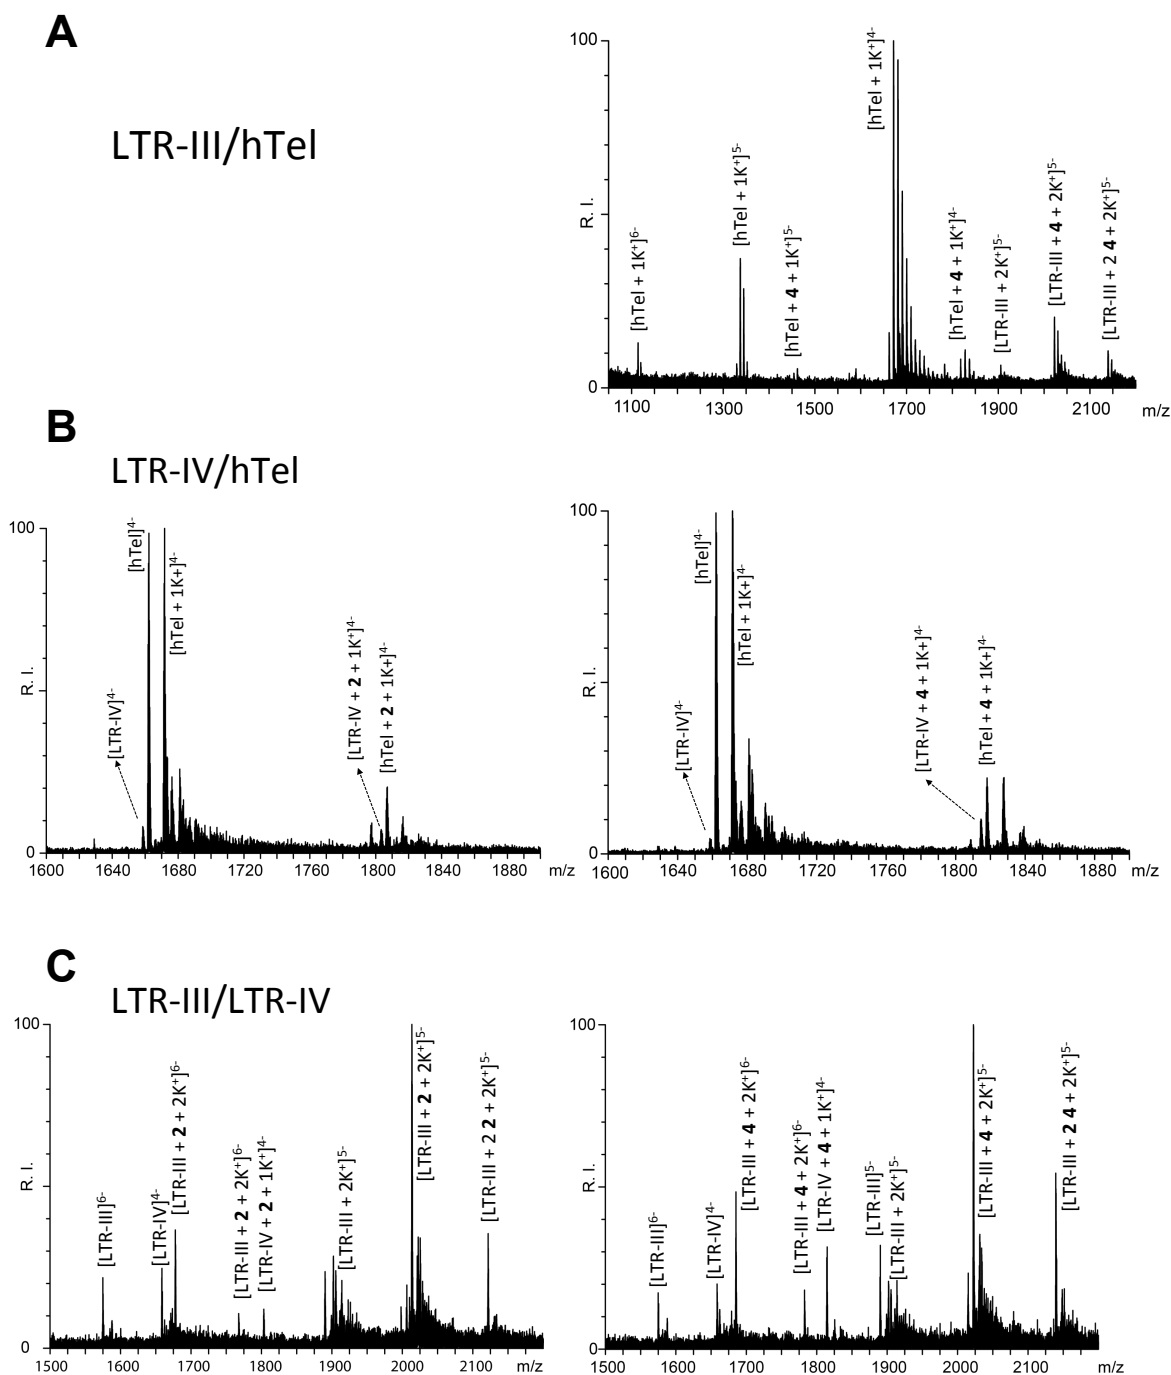

**Figure S5.** ESI/MS analysis of **c-exNDI 2** binding stoichiometry at saturating concentration (10-fold molar excess) towards the G4 structures. Representative spectrum of **c-exNDI 2** and LTR-III G4.

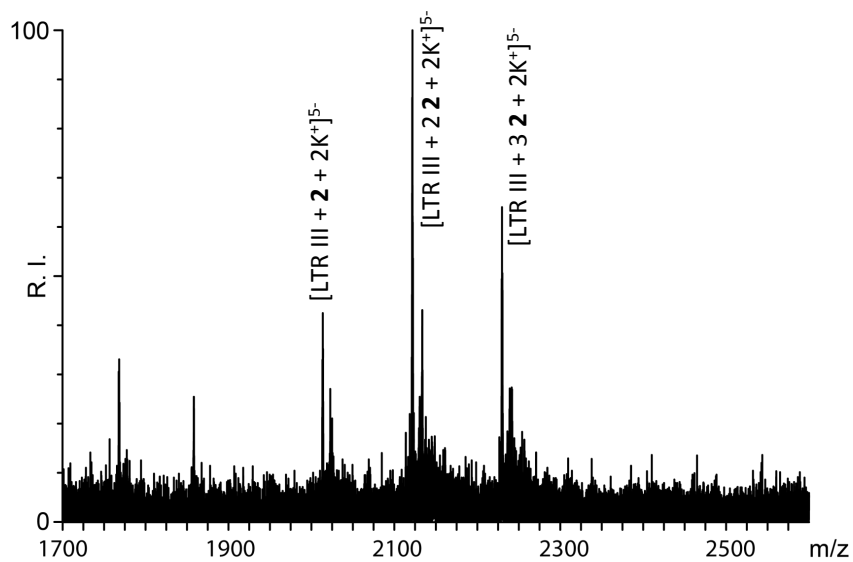

**Figure S6.** SPR analysis of **2** binding towards LTR-IV (upper panel) and hTel (lower panel) G4s. Biosensor data were collected at 25°C; the compound was injected at increasing concentrations (50, 100, 200, 300 nM). Sensograms are shown as grey lines. Dotted black lines represent local 1:1 binding fits obtained for a calculated  $R_{\max}$  of 33.6 (LTR-IV) and 34.8 (hTel) RU (Response Units).

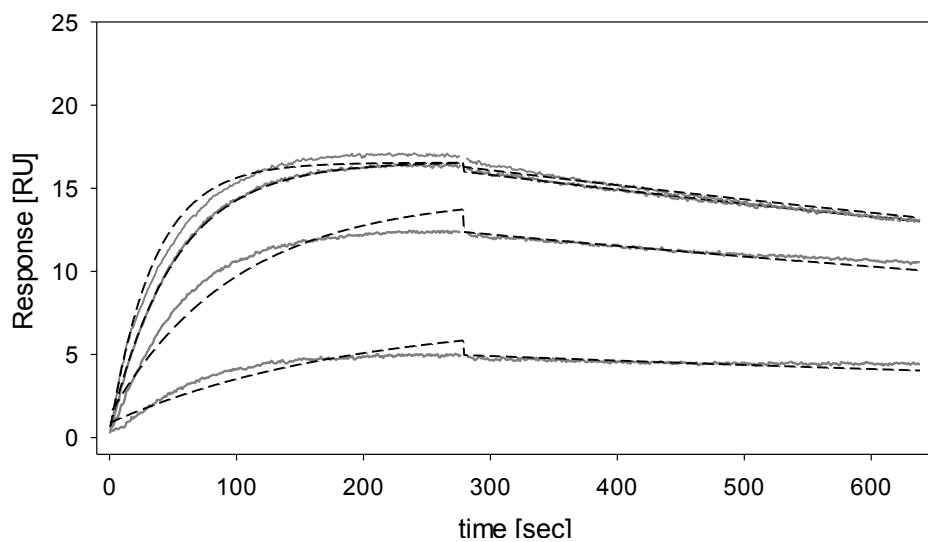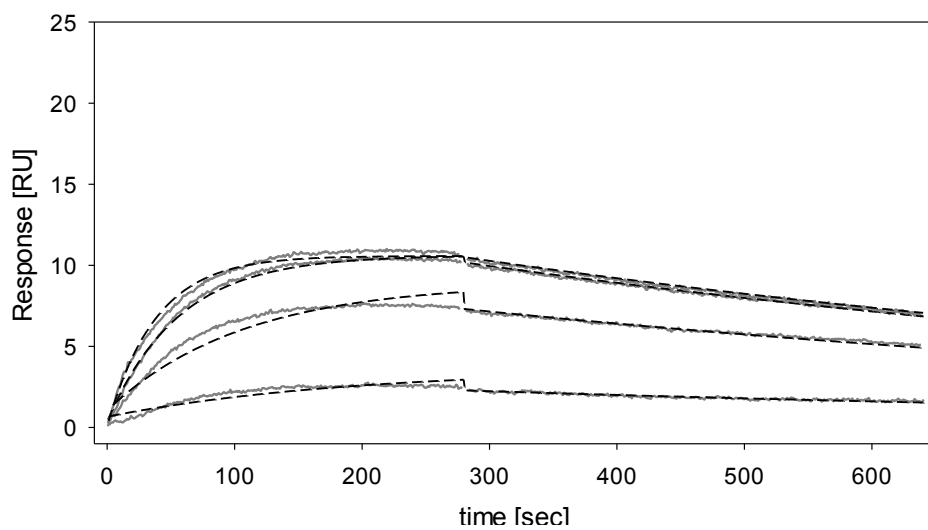

**Figure S7.** Assessment of **2** cell entry by fluorescence microscopy. TZM-bl cells were seeded (15000 cells/well) in  $\mu$ Clear black 96 well plate (CELLSTAR®, Greiner Bio-One GmbH, Frickenhausen, Germany ) and treated with **2** ( $12.5 \mu\text{M}$ ). After 30 min, the medium was replaced with PBS 1X and cells were observed with the fluorescence microscope Leica DFC 420C (Leica Microsystems Srl, Milano, Italy) equipped with a mercury AC lamp (Leistungselektronik JENA GmbH, Jena, Germany) and an appropriate filter to visualize the red fluorescence of the compound with a 20X ocular objective. Images were acquired with Leica Application Suite V3.8 program (Leica Microsystems Srl, Milano, Italy).

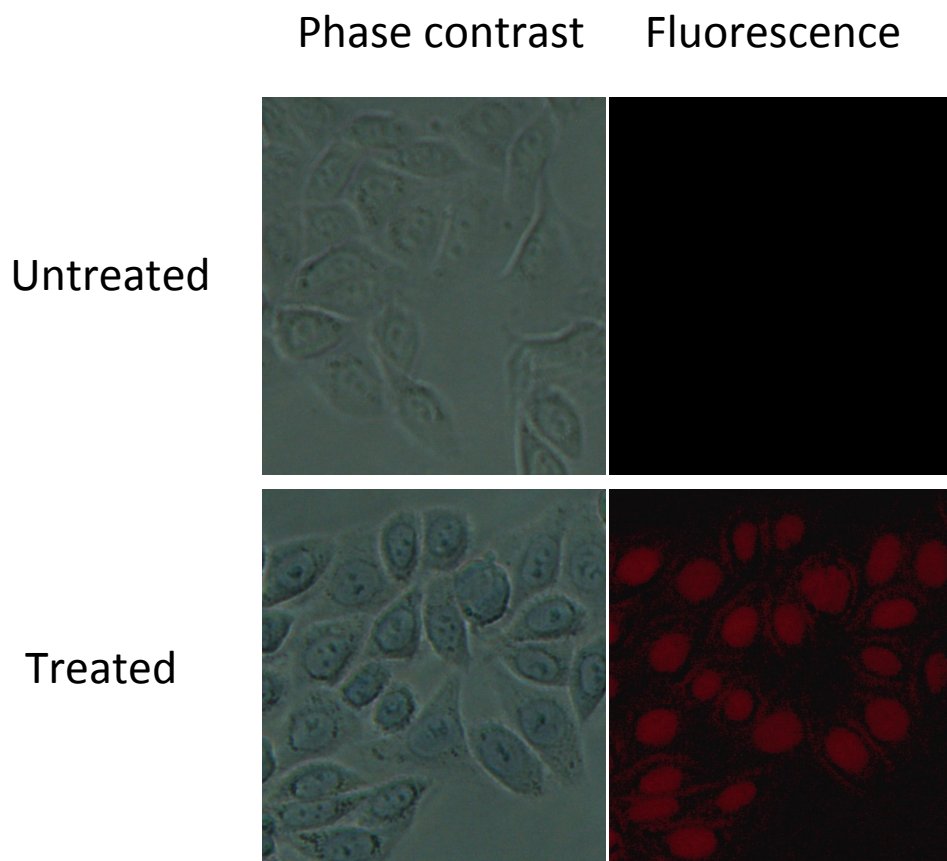



4·2HCl  
Analytical Method-A

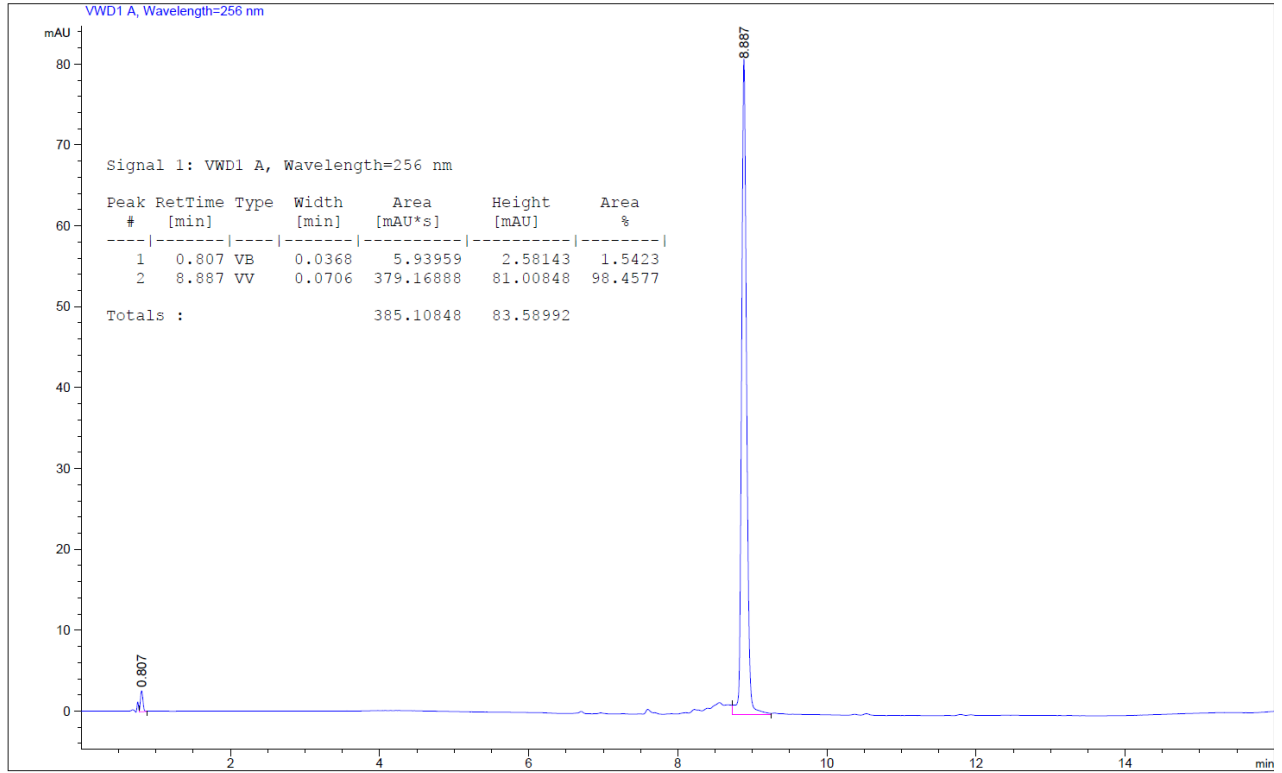

5·2HCl  
Analytical Method-A

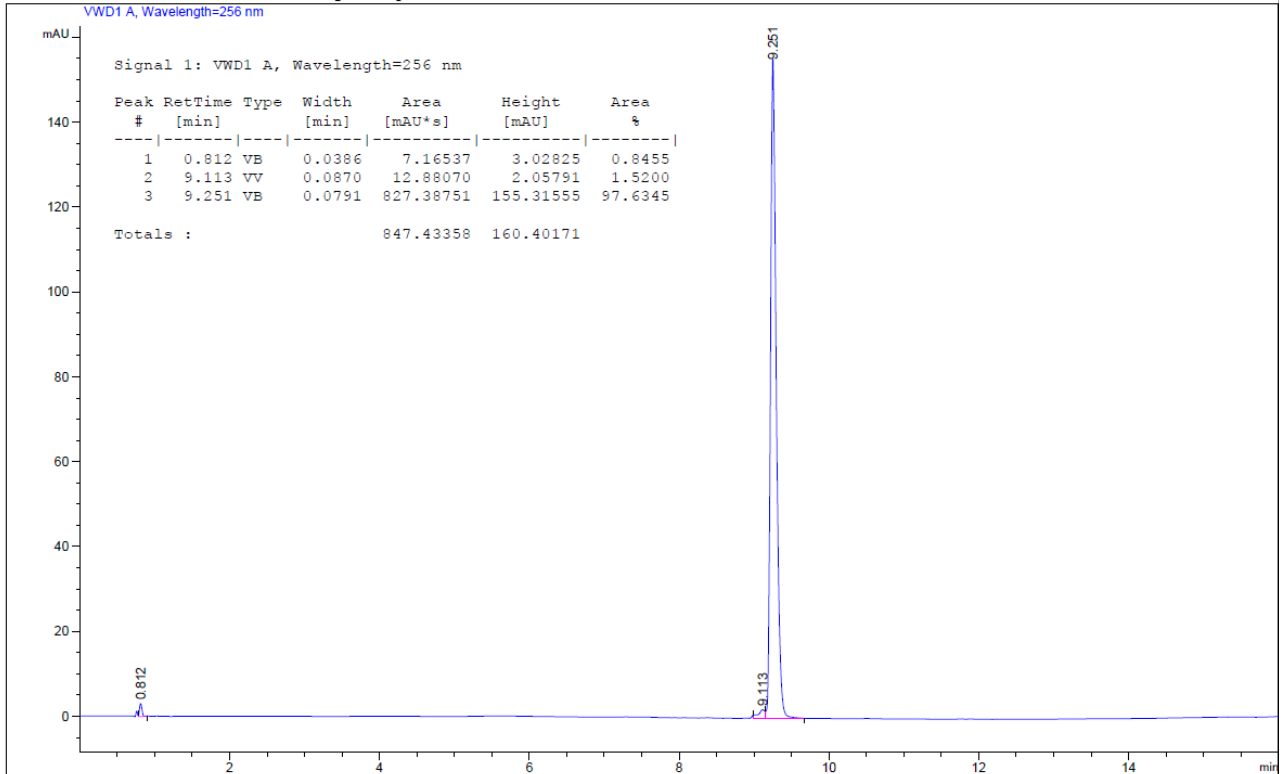



6·2HCl  
Analytical Method-A

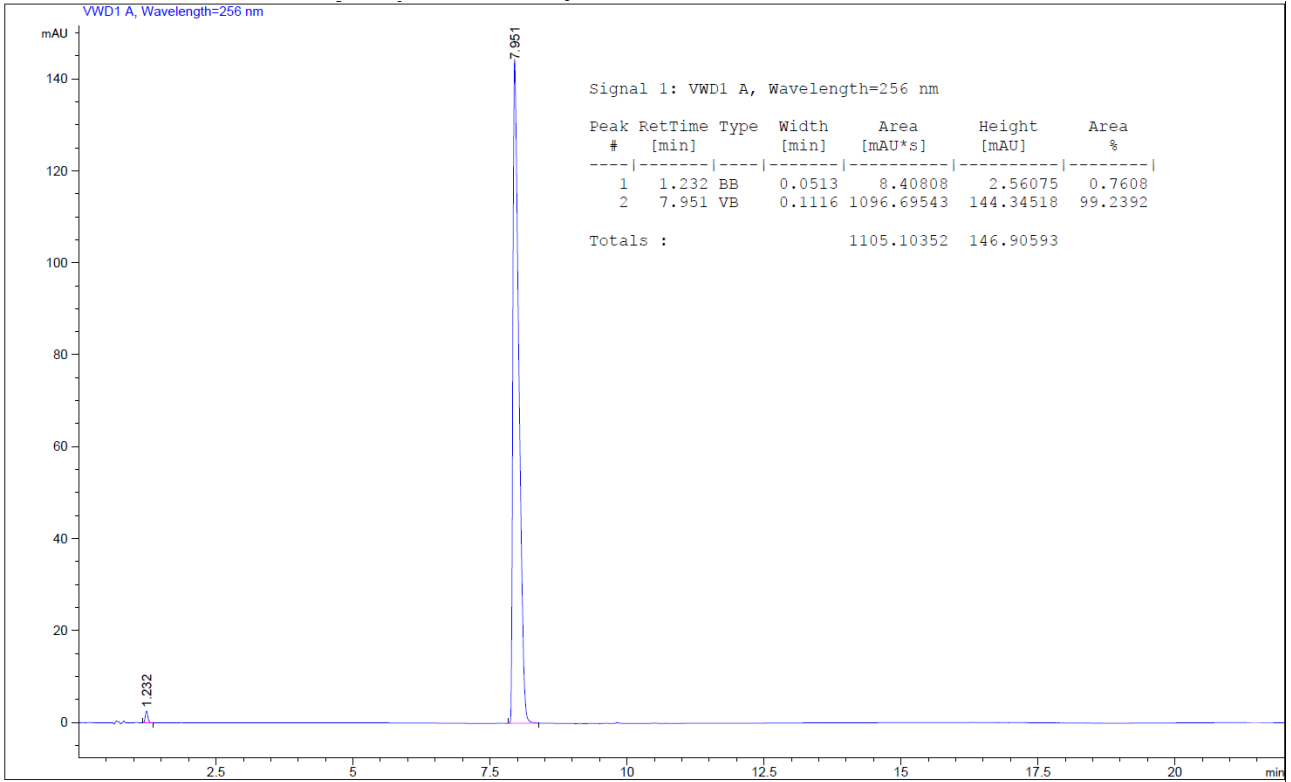

7·2HCl  
Analytical Method-A

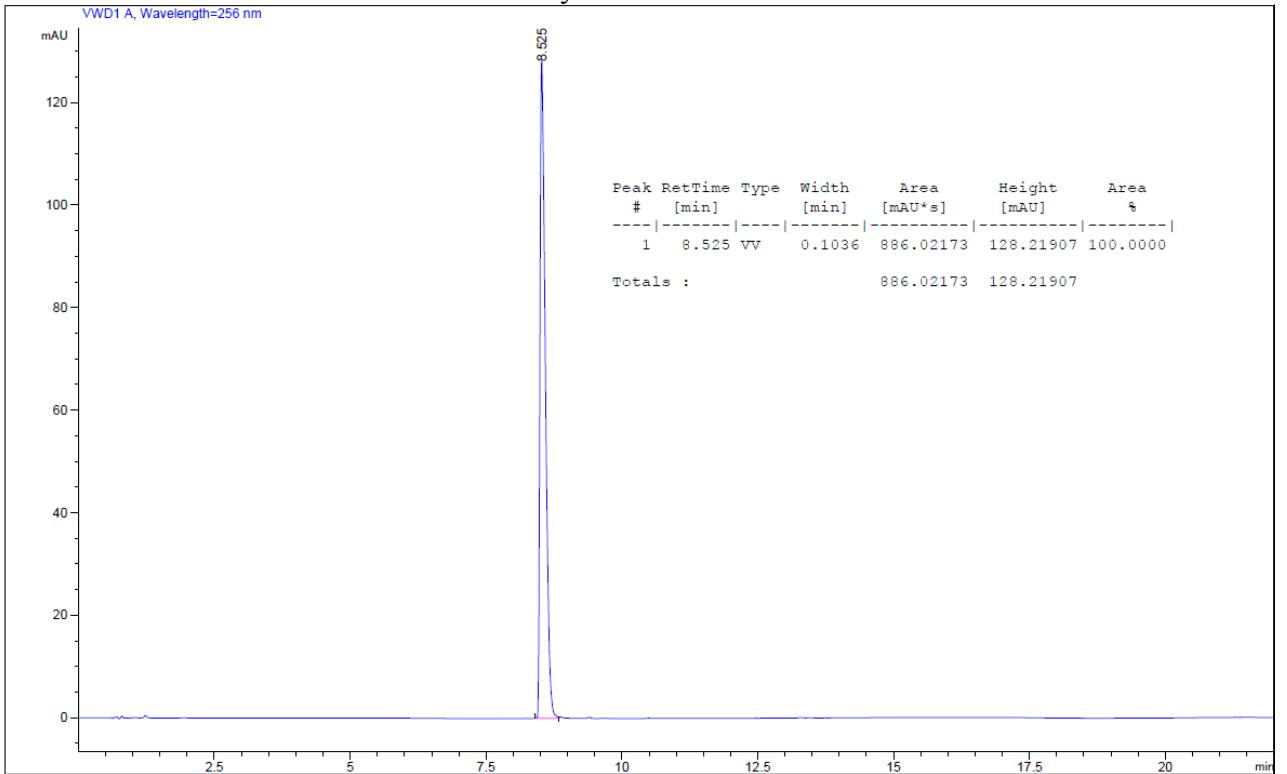

## 8·2HCl Analytical Method-A

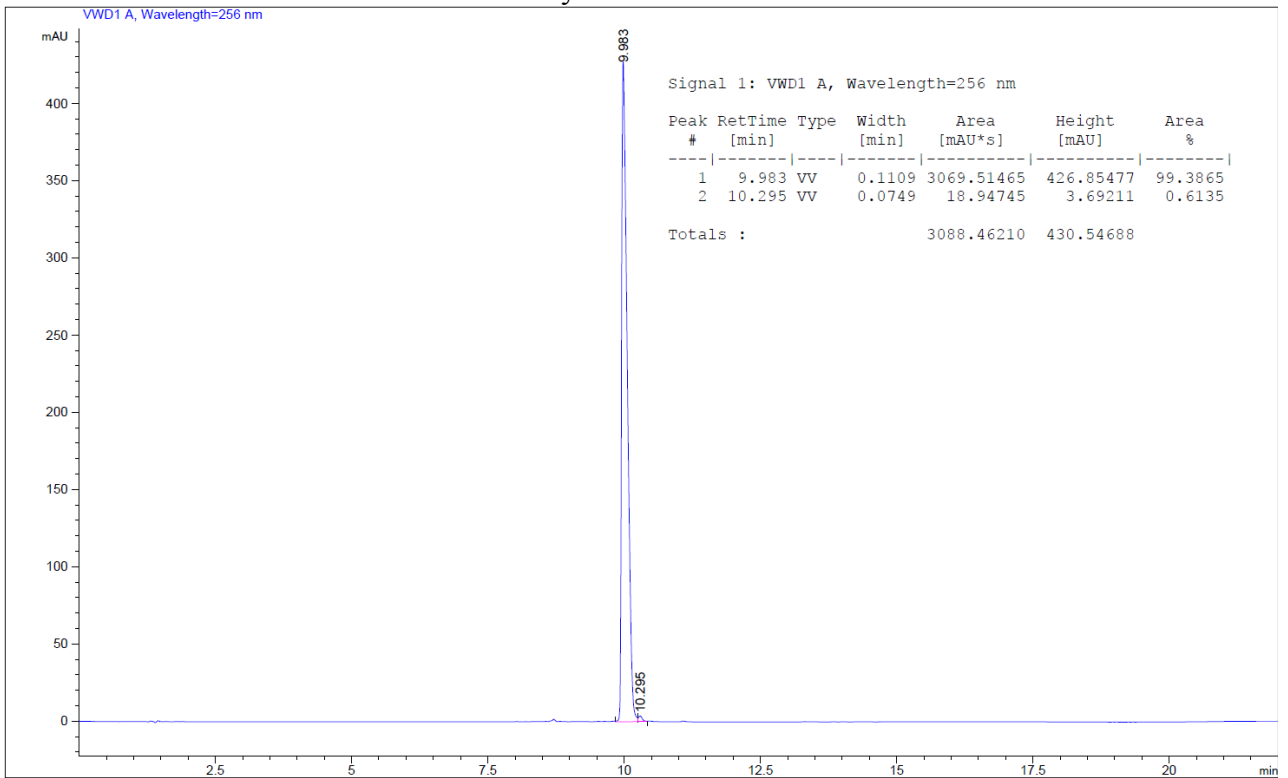

## 9·3HCl Analytical Method-A

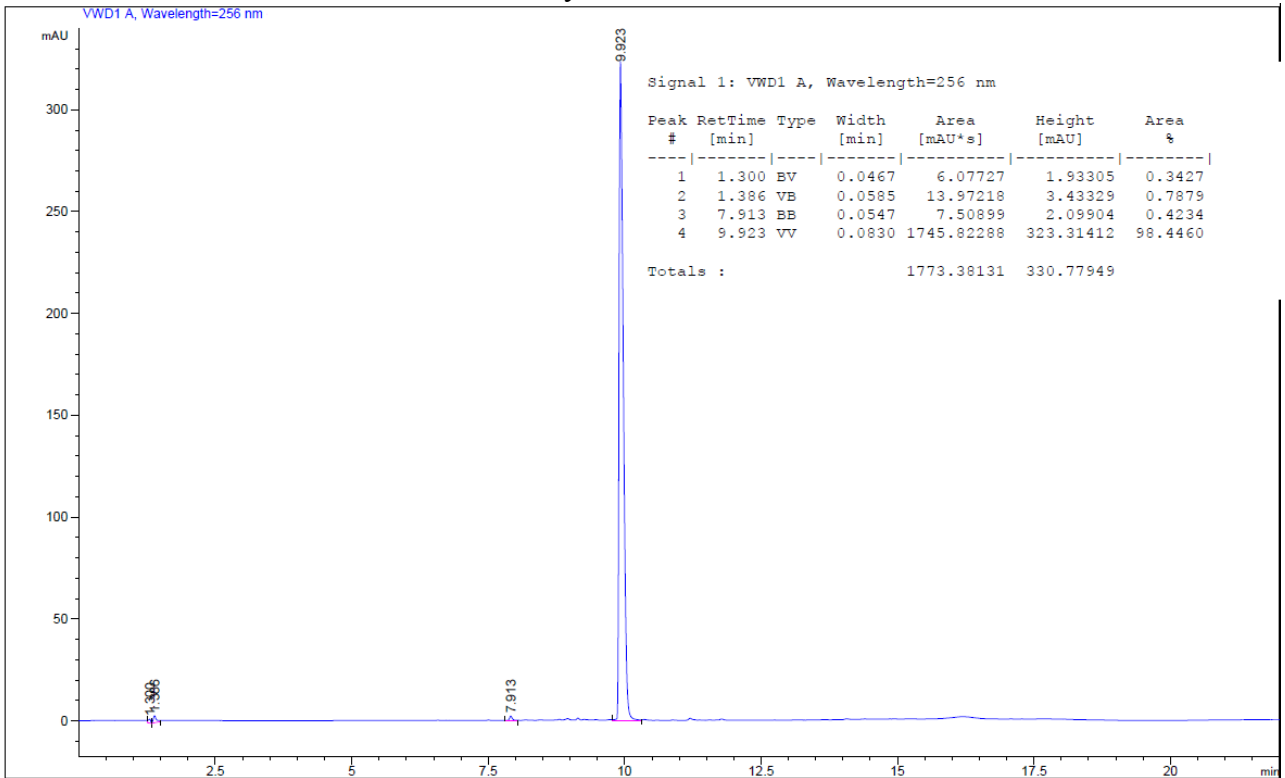

# 10

## Analytical Method-A

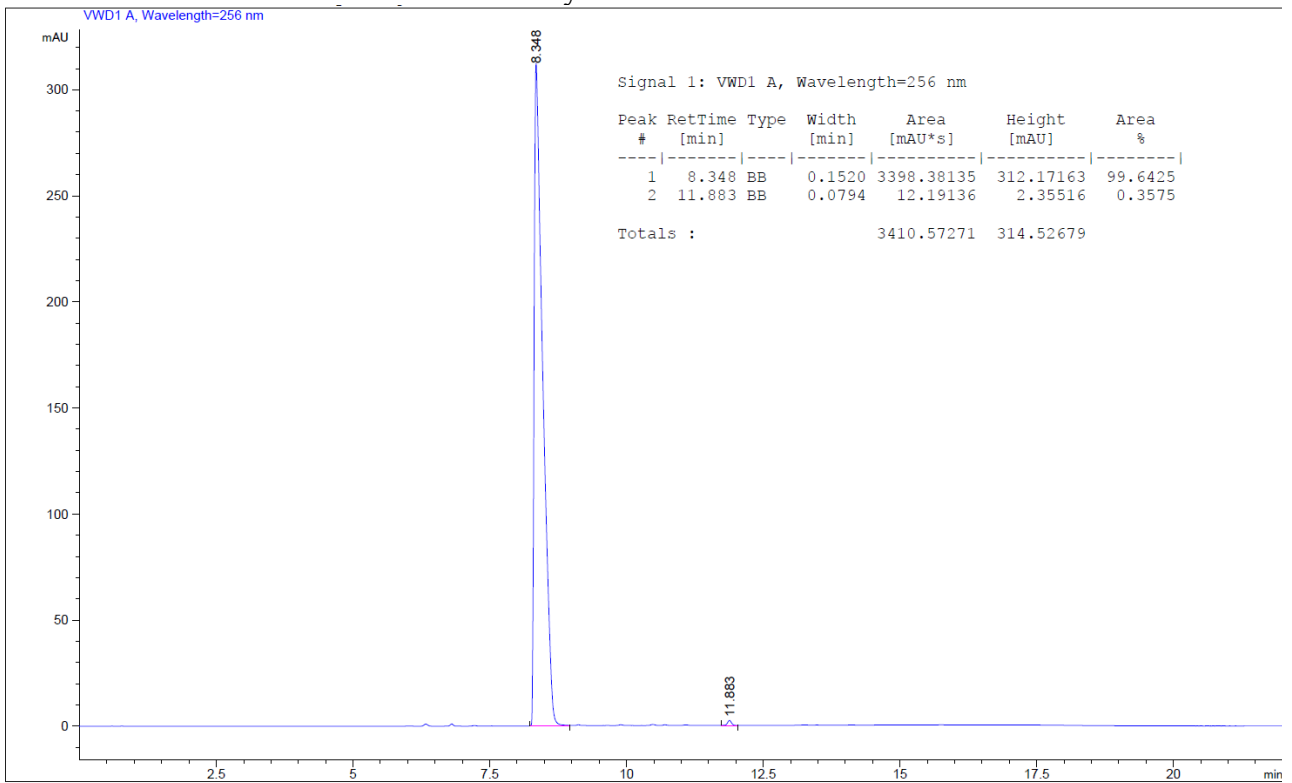

# 11

## Analytical Method-A

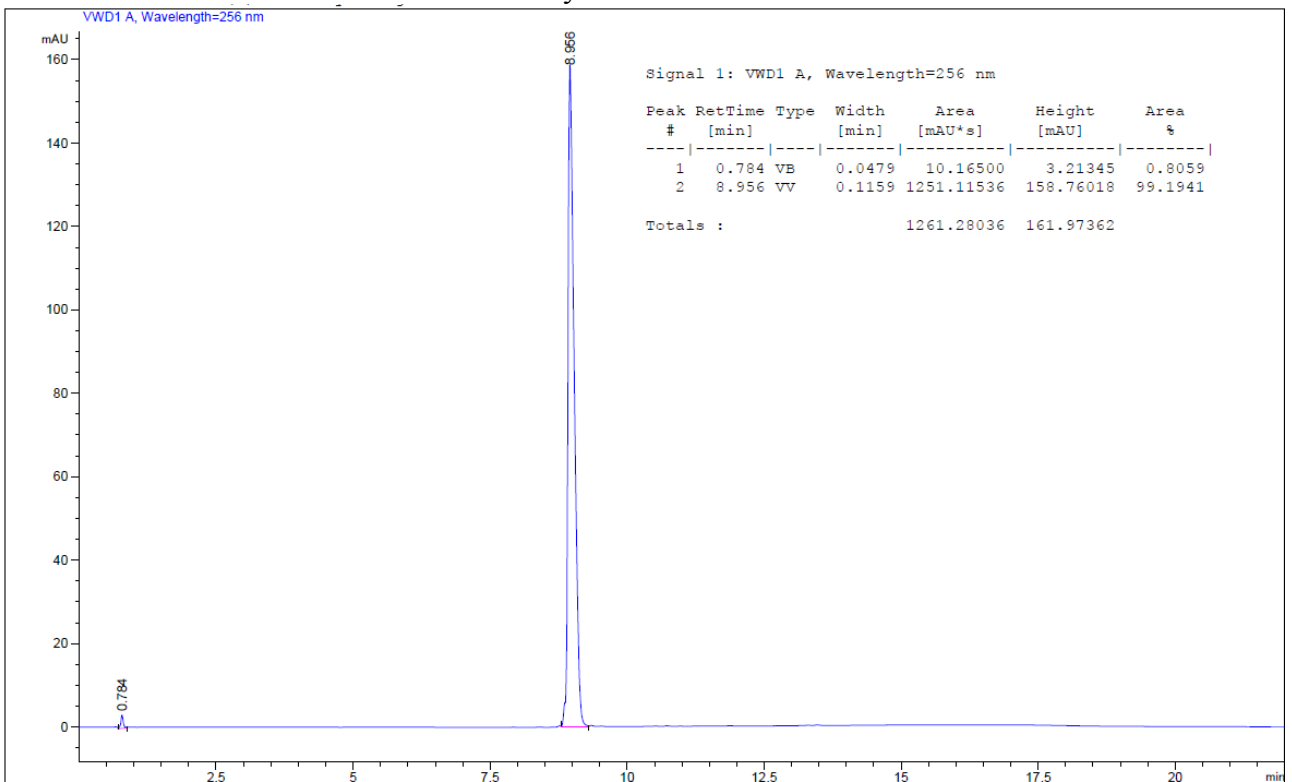

# NMR Spectra:

## 2·2HCl (CD<sub>3</sub>OD) <sup>1</sup>H NMR 300MHz

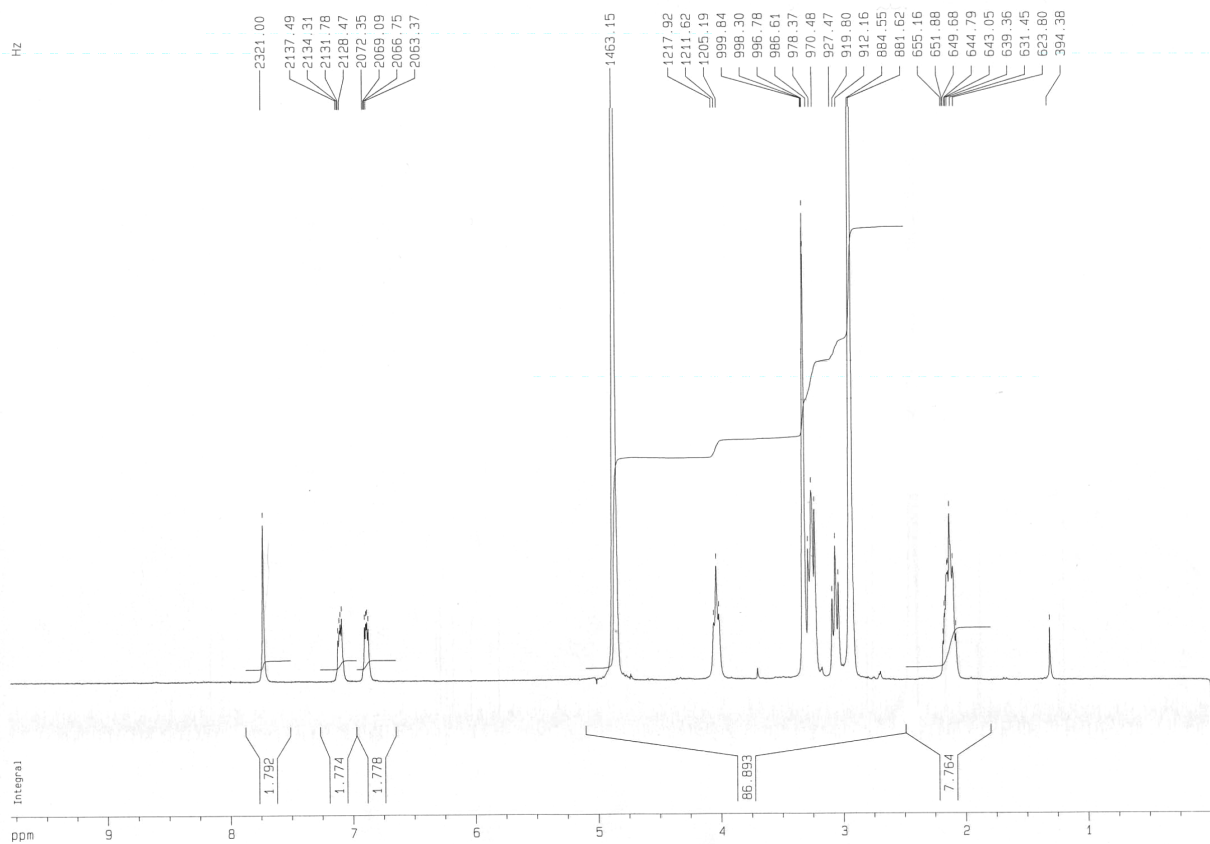

## (CD<sub>3</sub>OD) <sup>13</sup>C NMR 75MHz

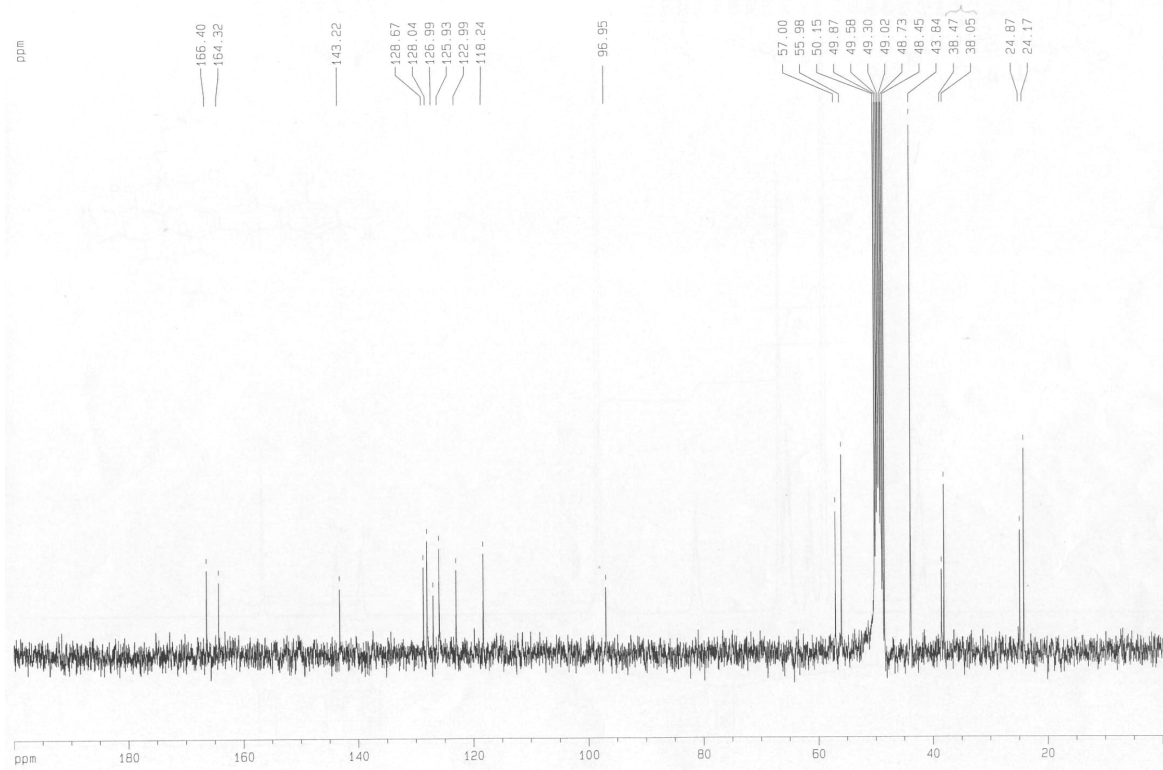

**3·2HCl**  
(CD<sub>3</sub>OD) <sup>1</sup>H NMR 300MHz

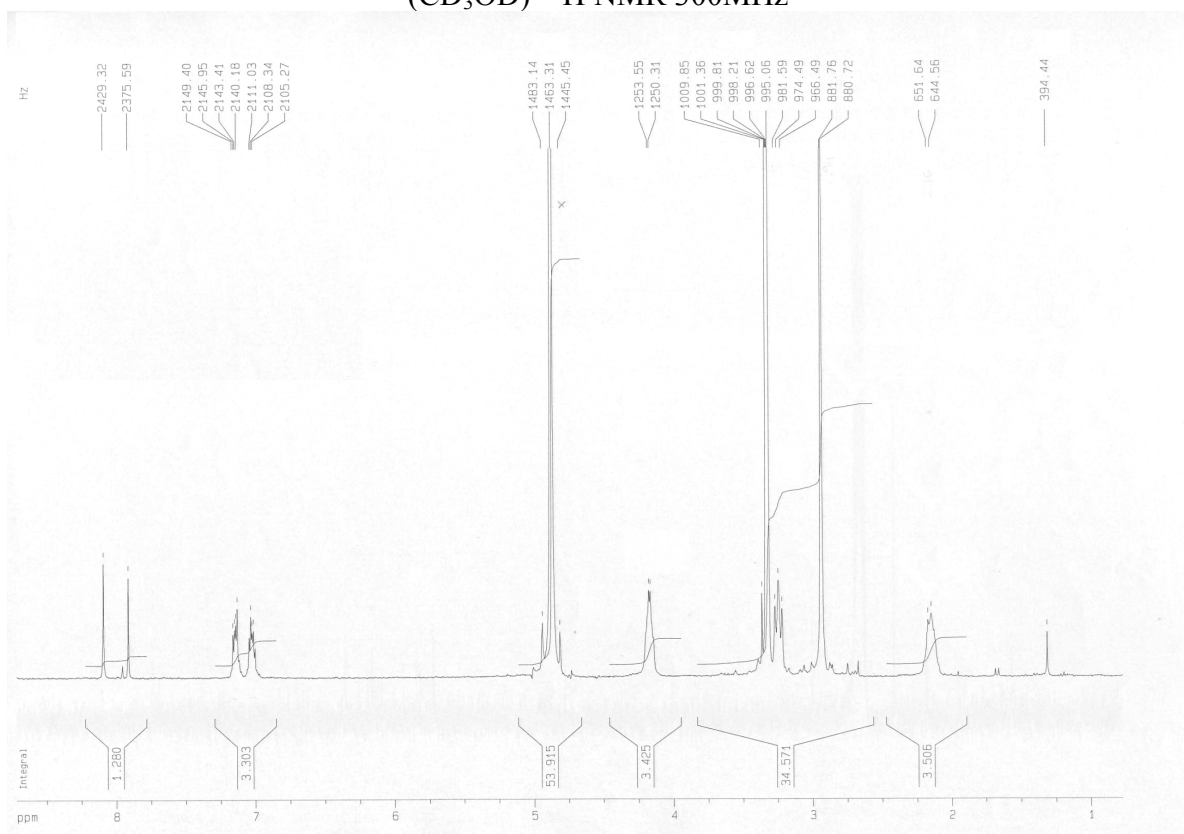

(CD<sub>3</sub>OD) <sup>13</sup>C NMR 75MHz

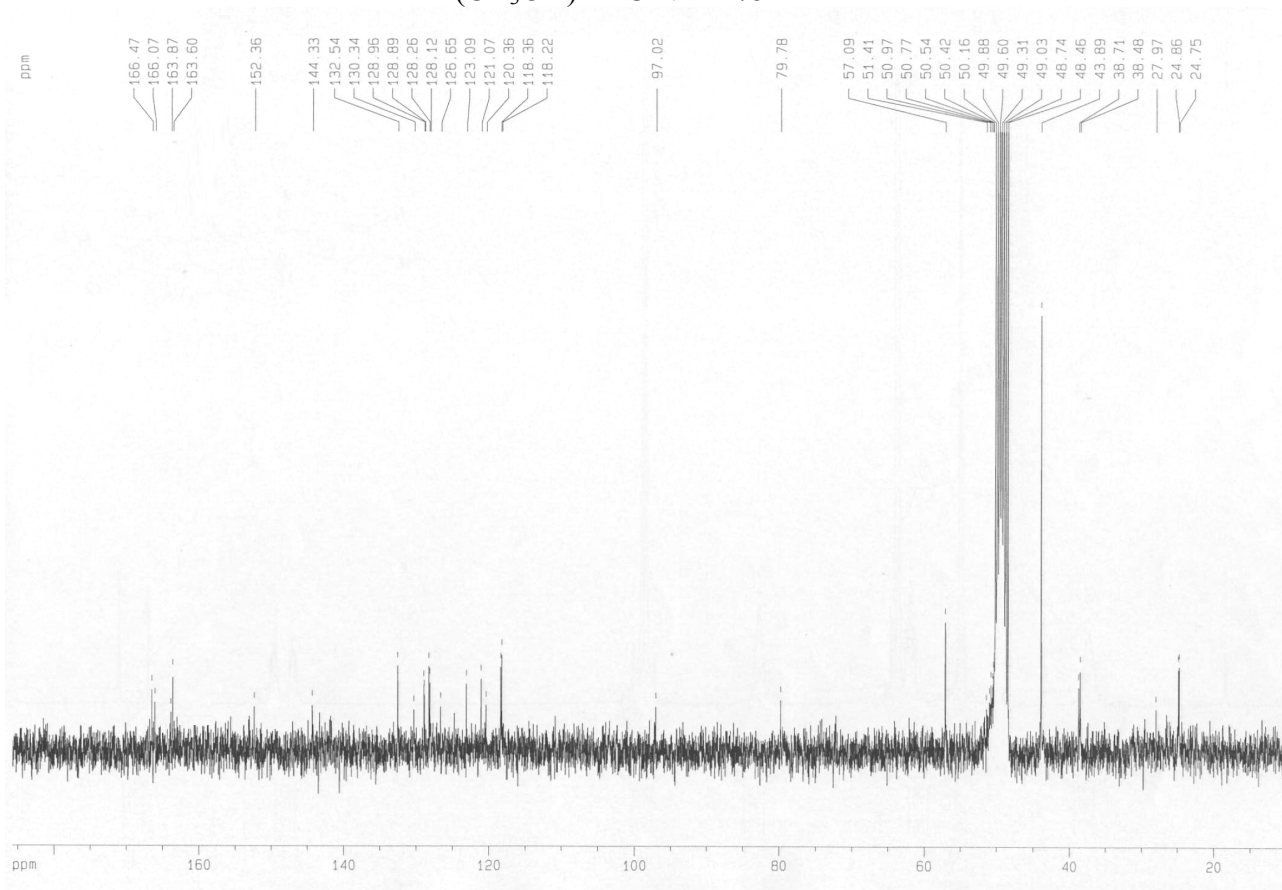

4·2HCl  
(CD<sub>3</sub>OD) <sup>1</sup>H NMR 300MHz

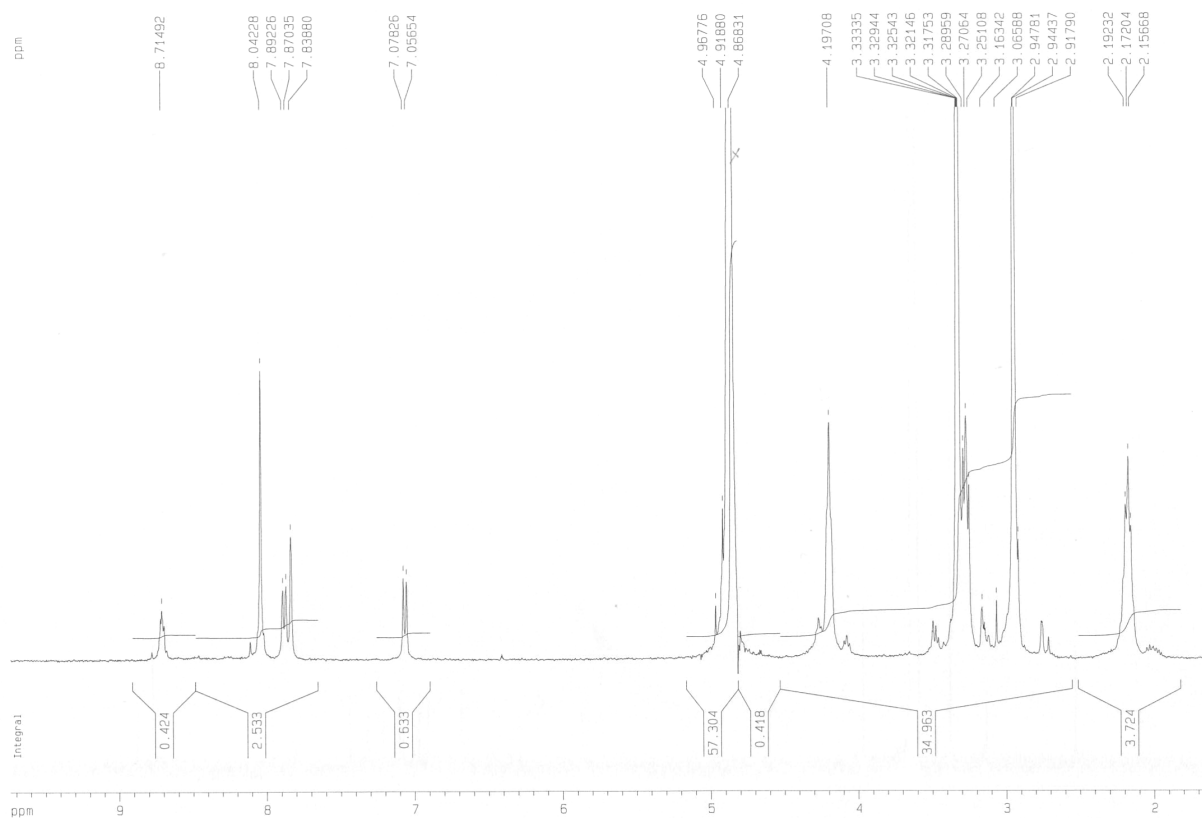

(CD<sub>3</sub>OD) <sup>13</sup>C NMR 75MHz

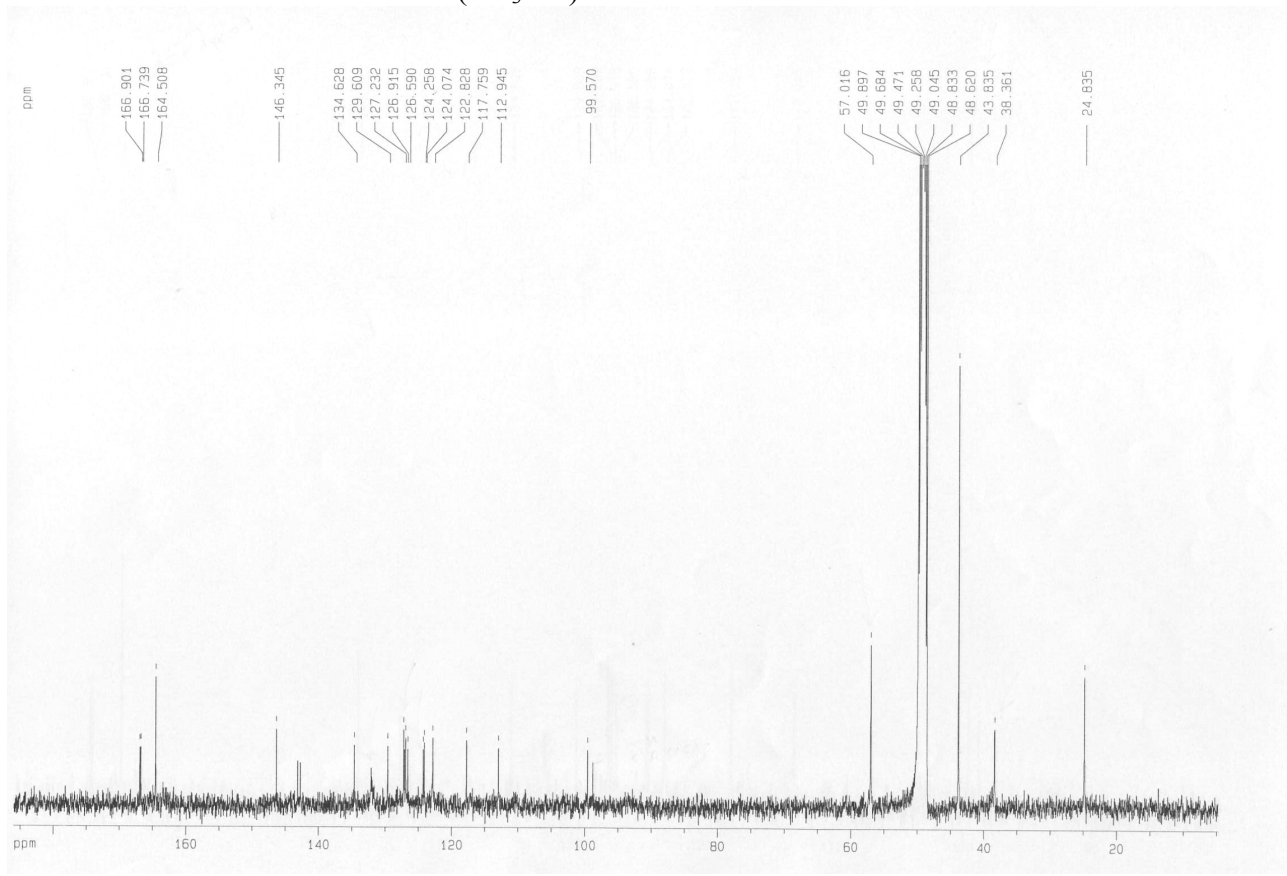

5·2HCl

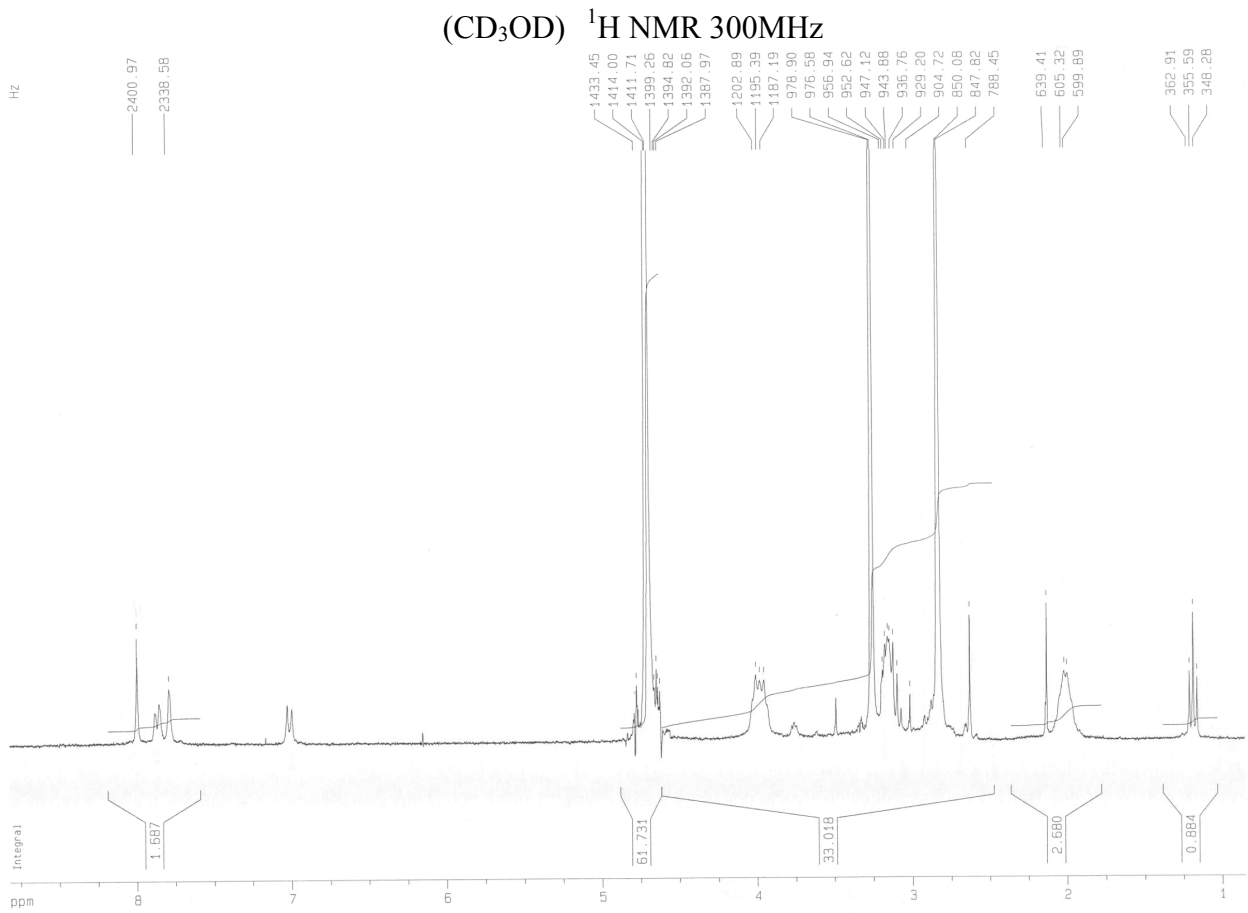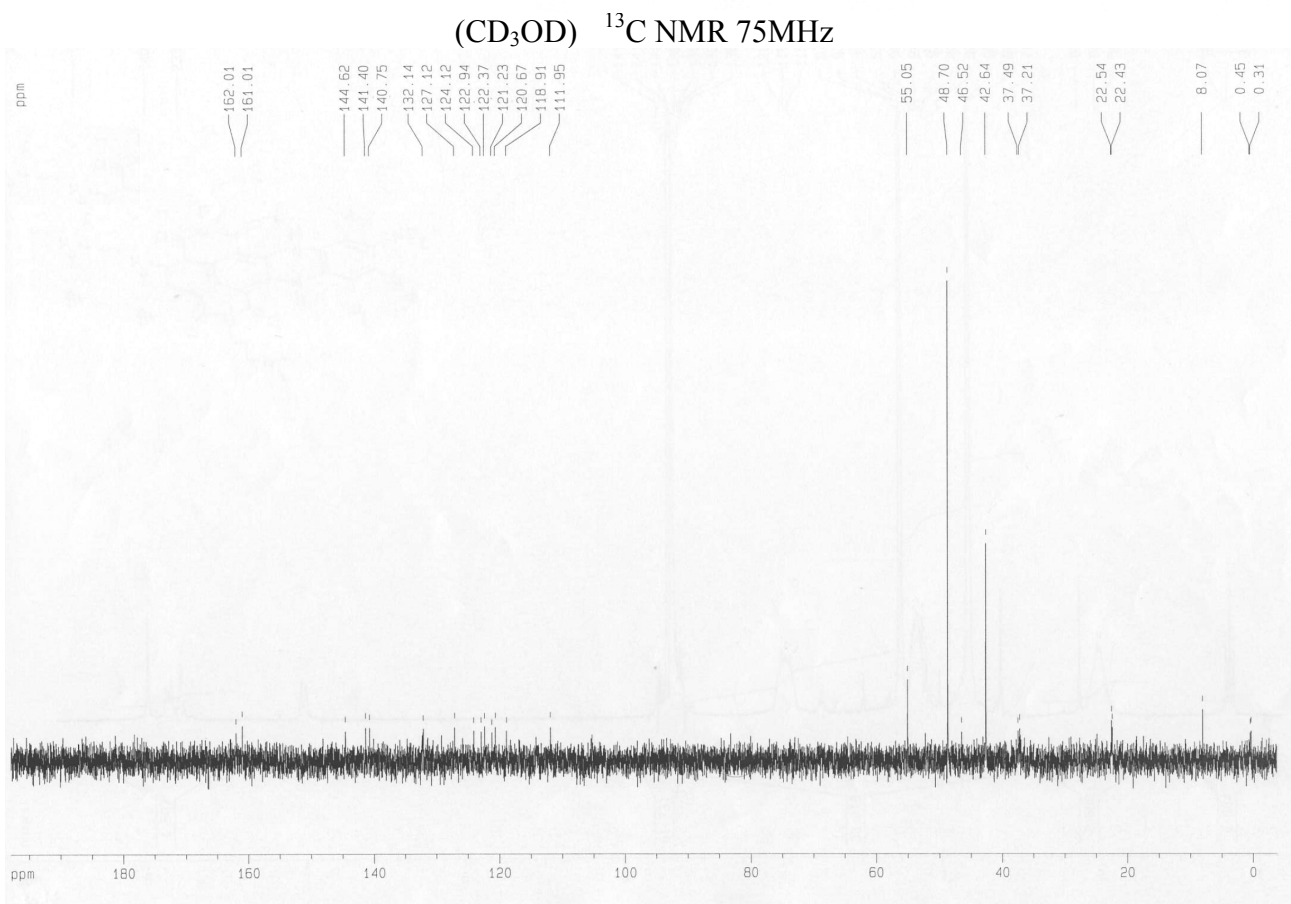

**6·2HCl**

(CD<sub>3</sub>OD) <sup>1</sup>H NMR 400MHz

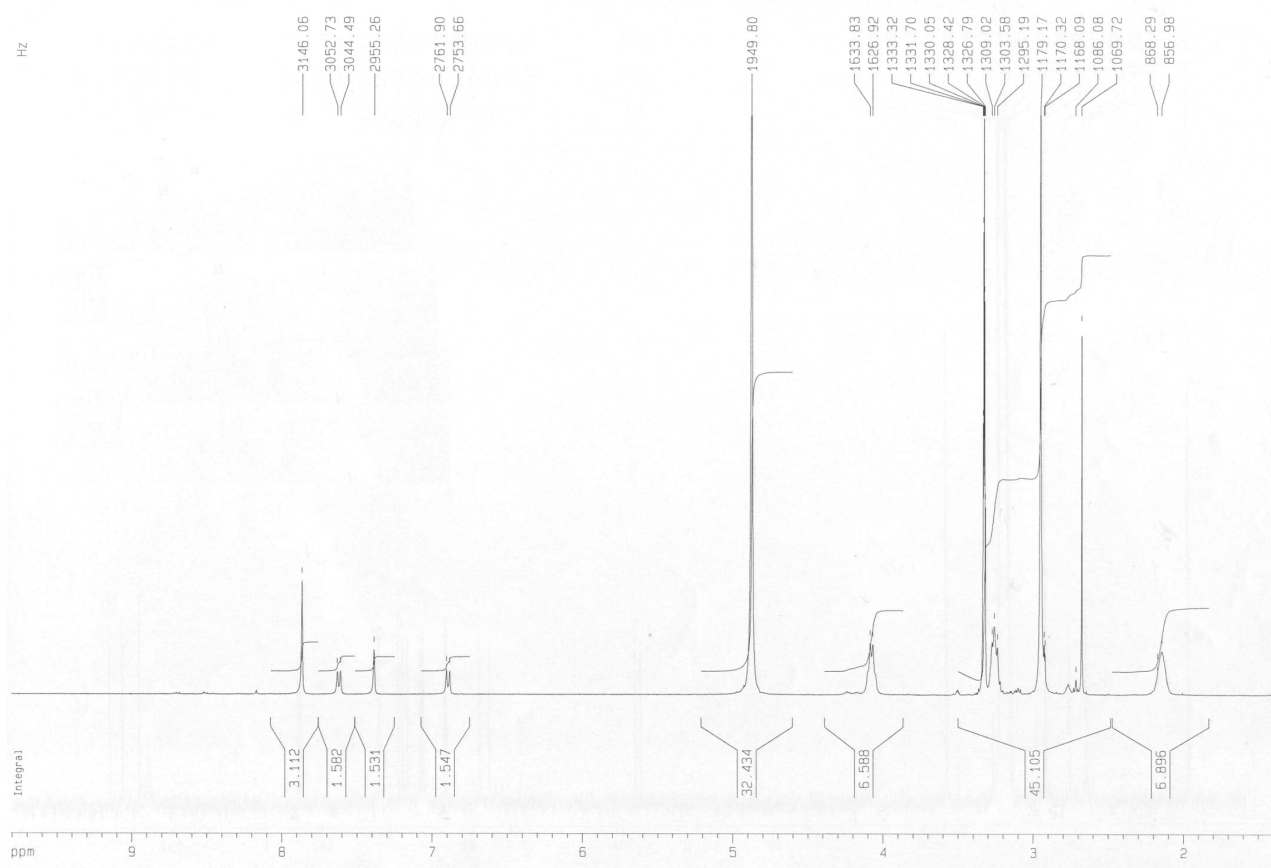

(CD<sub>3</sub>OD) <sup>13</sup>C NMR 100MHz

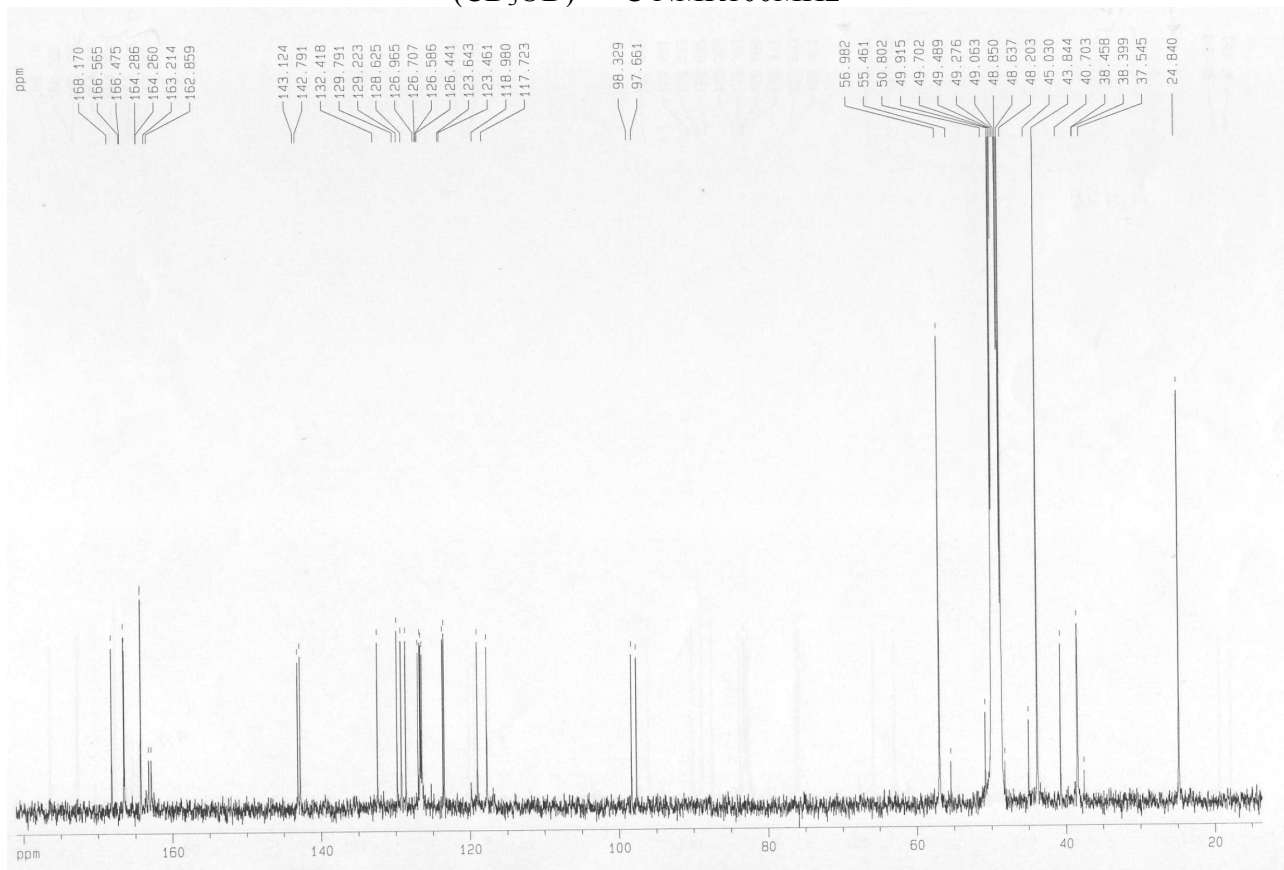

7·2HCl



(CD<sub>3</sub>OD) <sup>1</sup>H NMR 300MHz

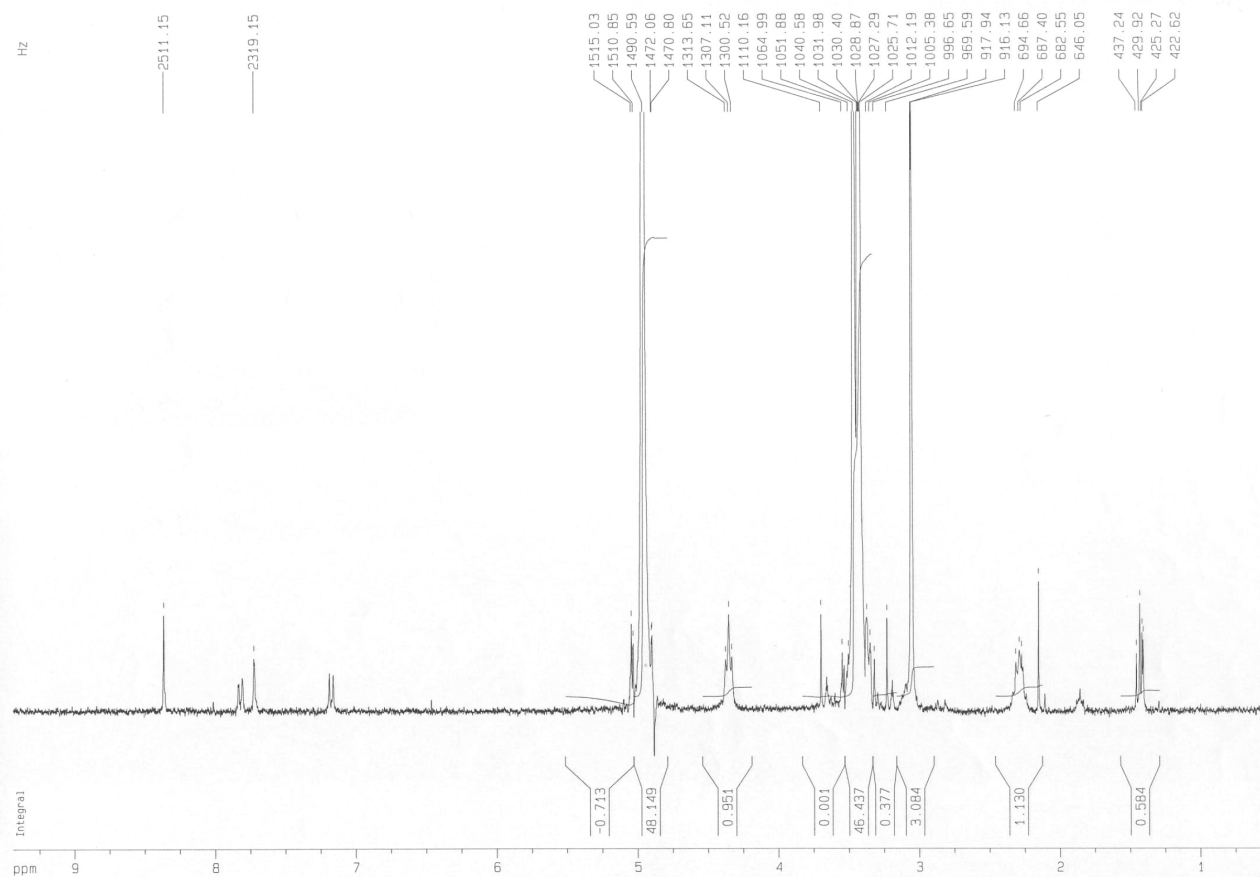

(CD<sub>3</sub>OD) <sup>13</sup>C NMR 75MHz

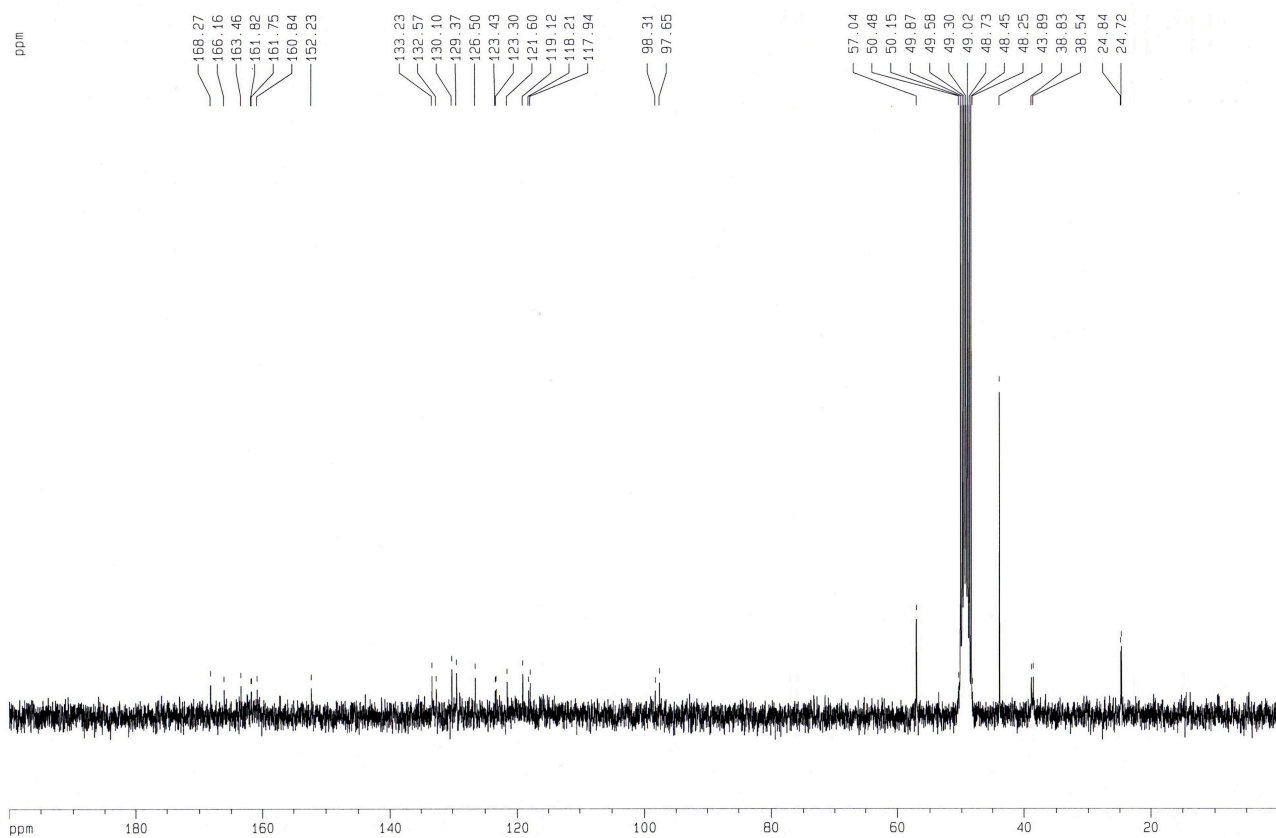

8-3HCl

(CD<sub>3</sub>OD) <sup>1</sup>H NMR 400MHz

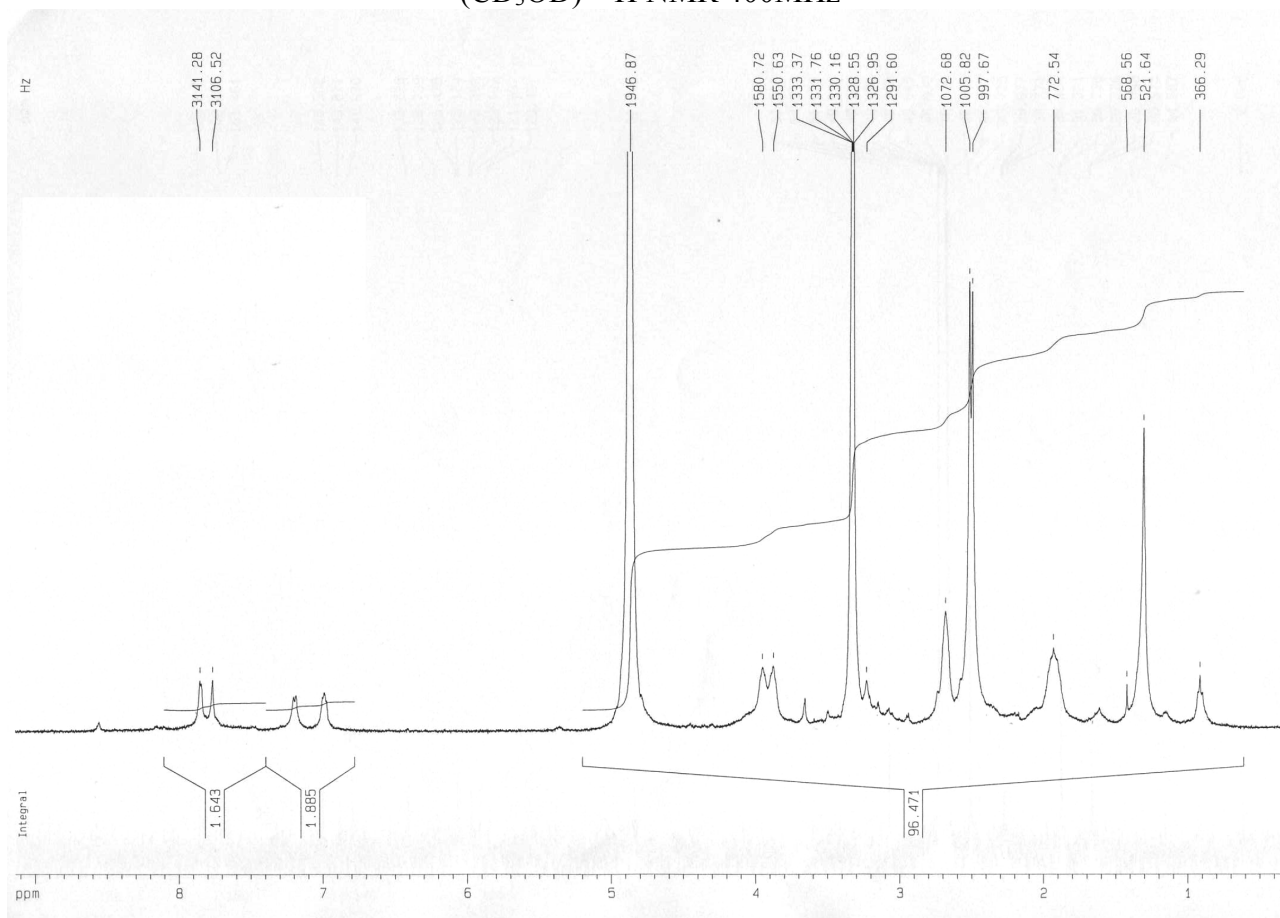

(CD<sub>3</sub>OD) <sup>13</sup>C NMR 100MHz

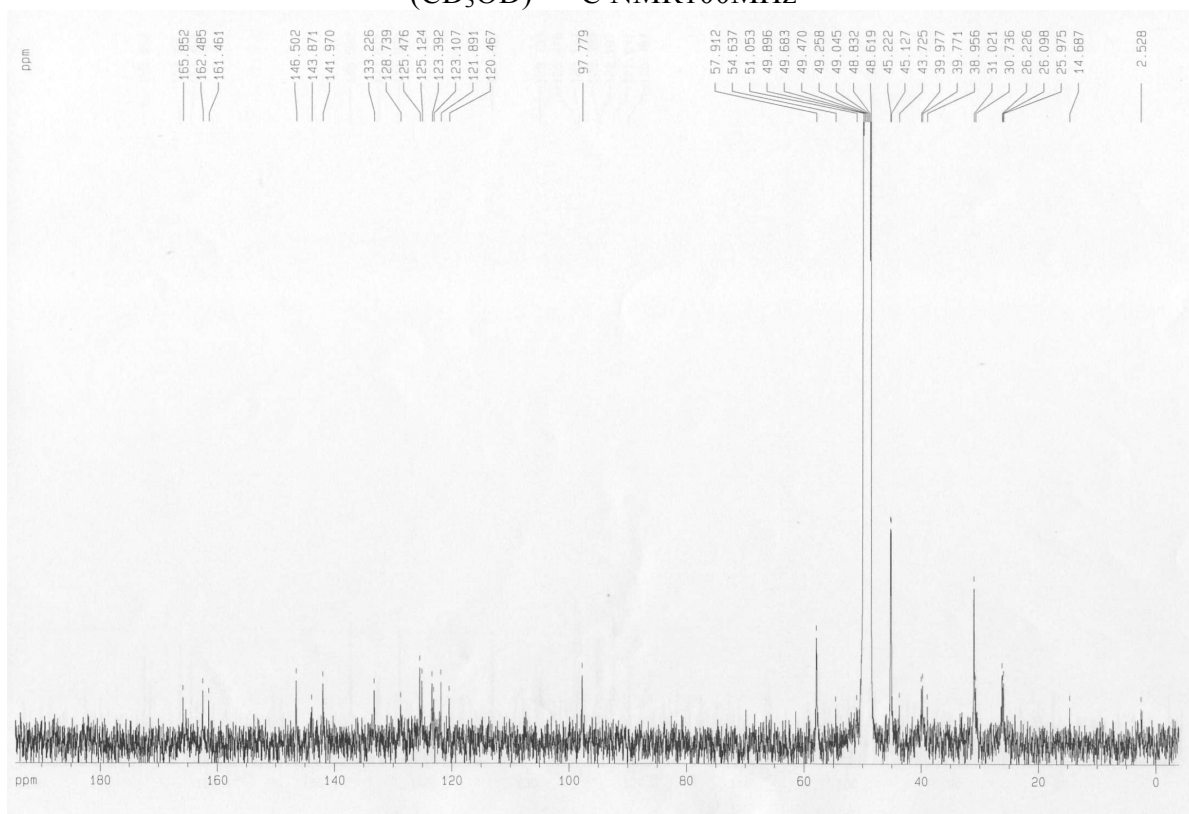

**9-3HCl**  
(CD<sub>3</sub>OD) <sup>1</sup>H NMR 300MHz

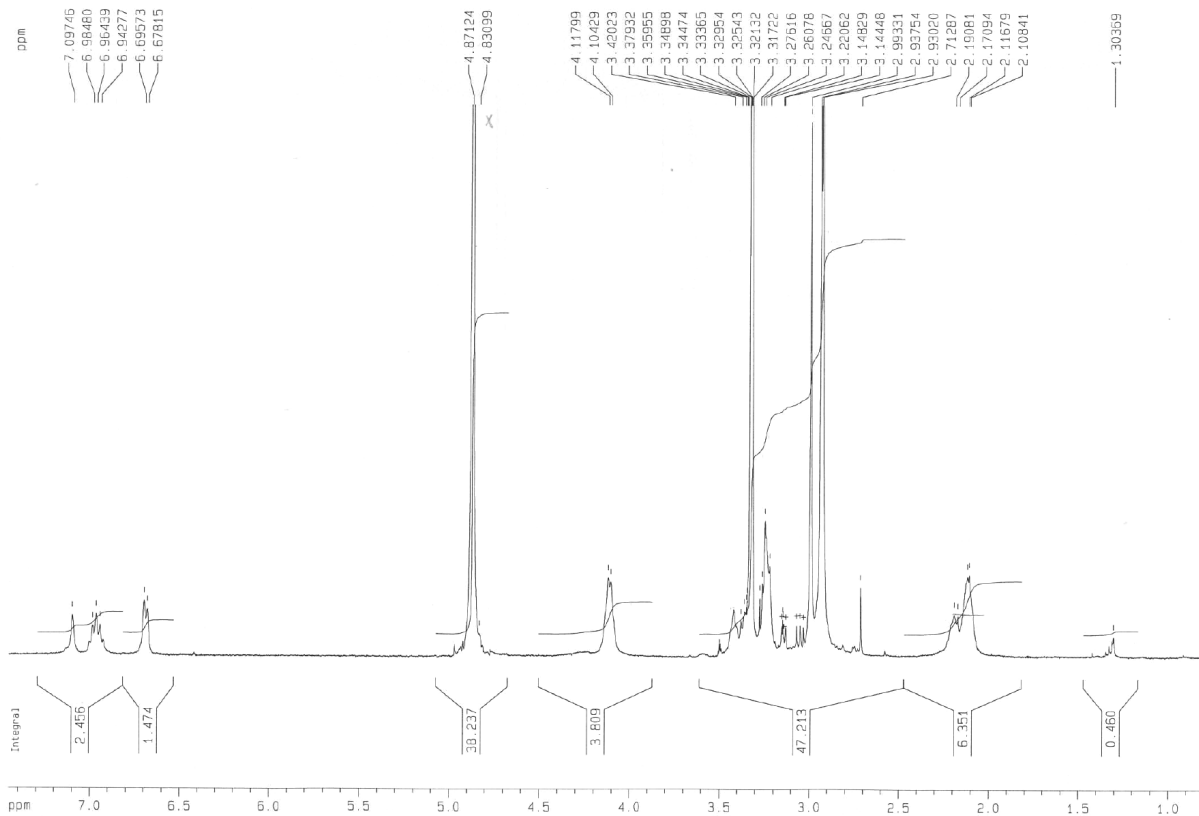

(CD<sub>3</sub>OD) <sup>13</sup>C NMR 75MHz

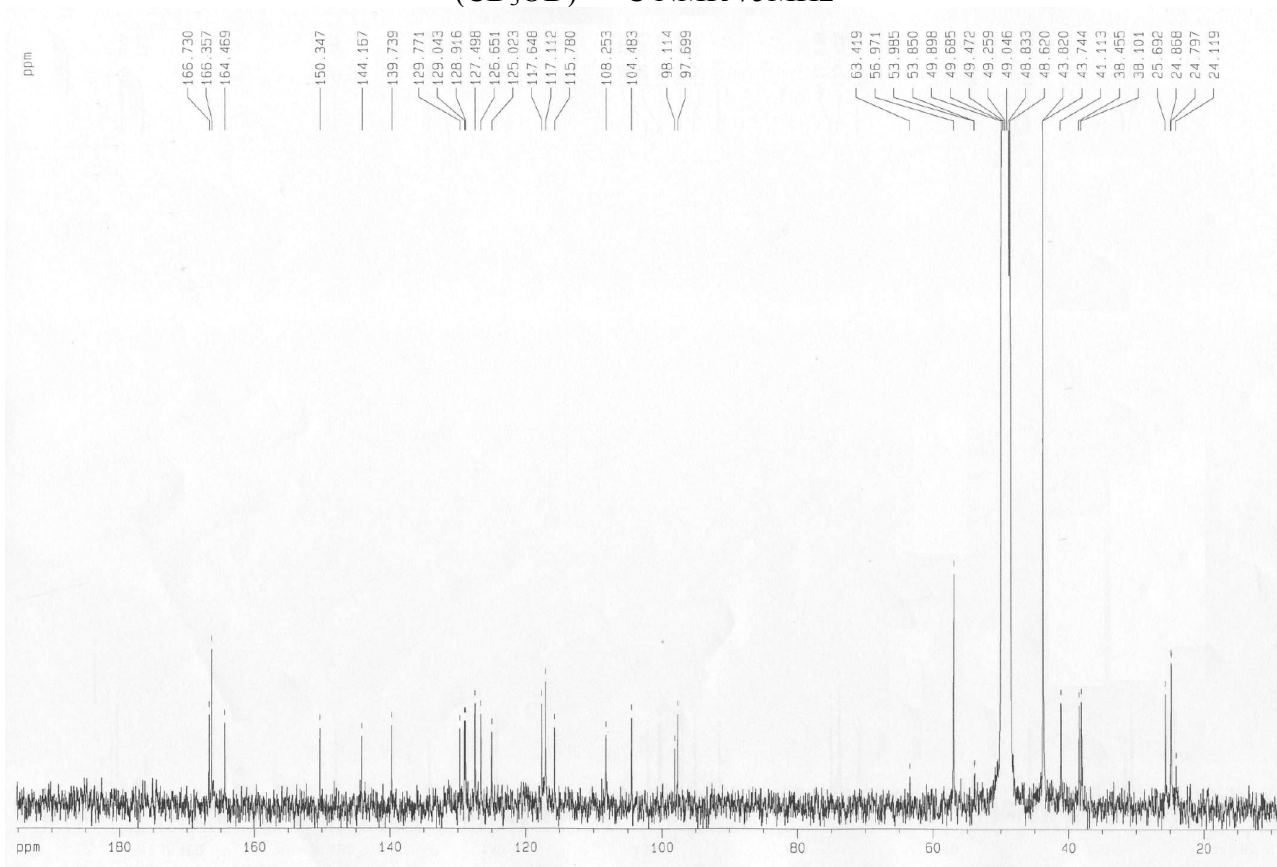

**10**  
(CD<sub>3</sub>OD) <sup>1</sup>H NMR 400MHz

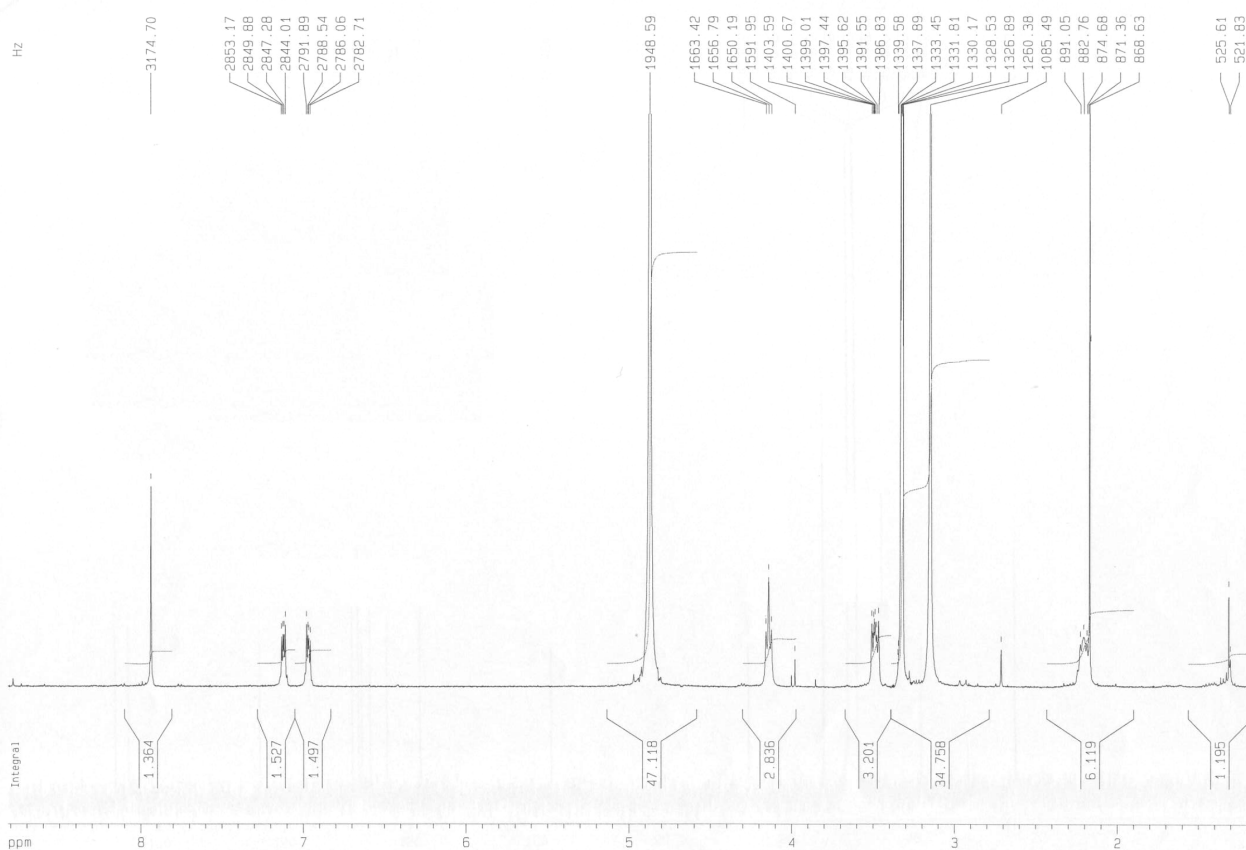

(CD<sub>3</sub>OD) <sup>13</sup>C NMR 100MHz

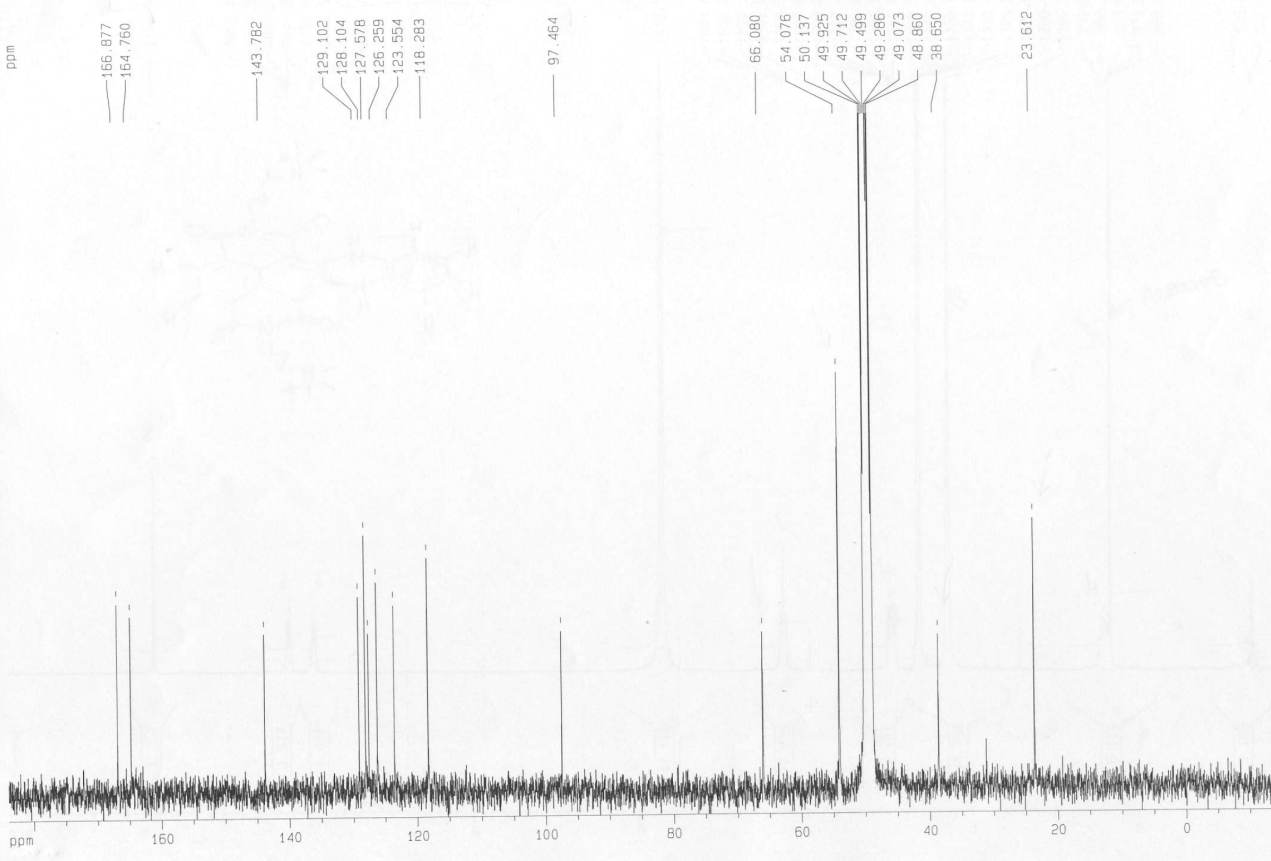

**11**  
(CD<sub>3</sub>OD) <sup>1</sup>H NMR 400MHz

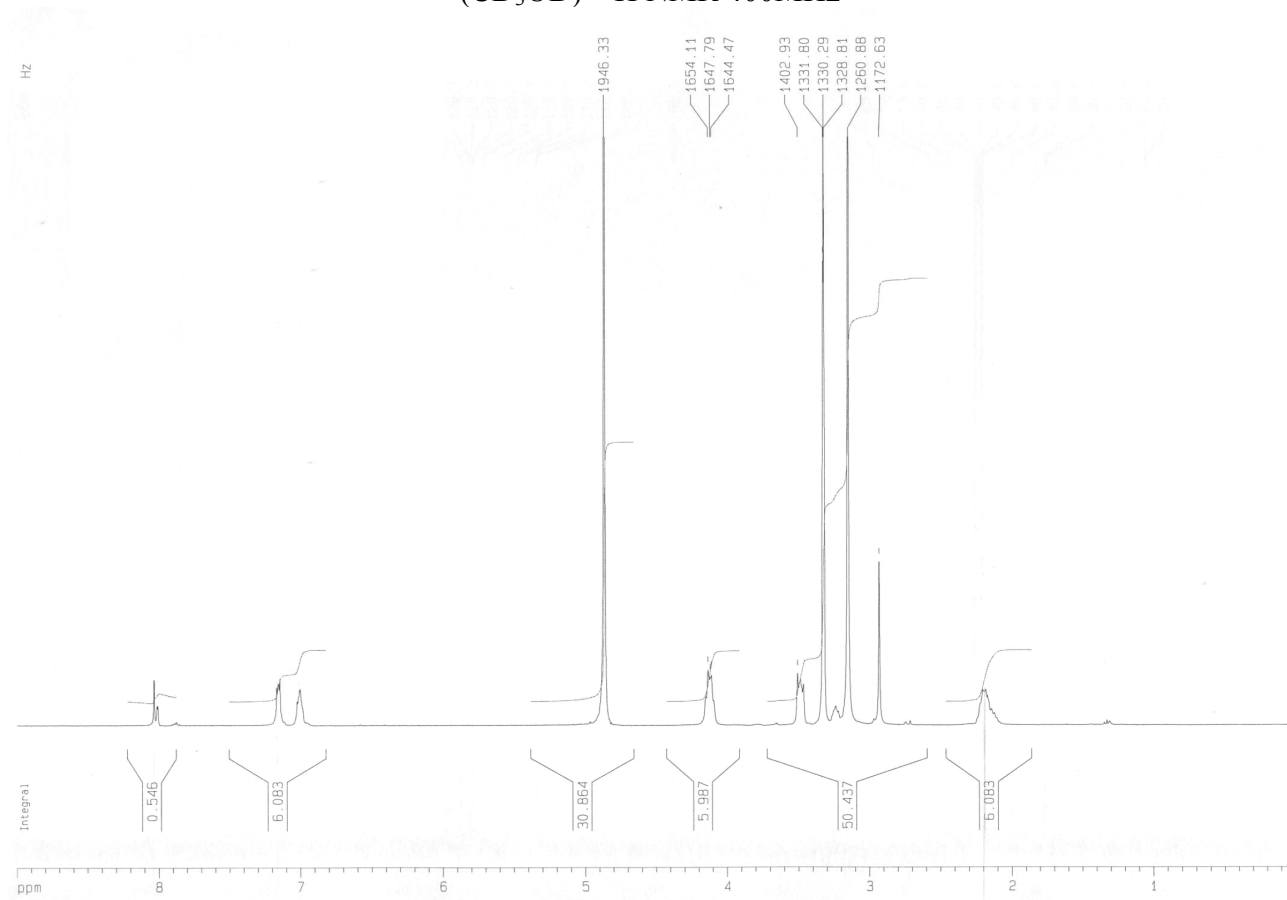

(CD<sub>3</sub>OD) <sup>13</sup>C NMR 100MHz

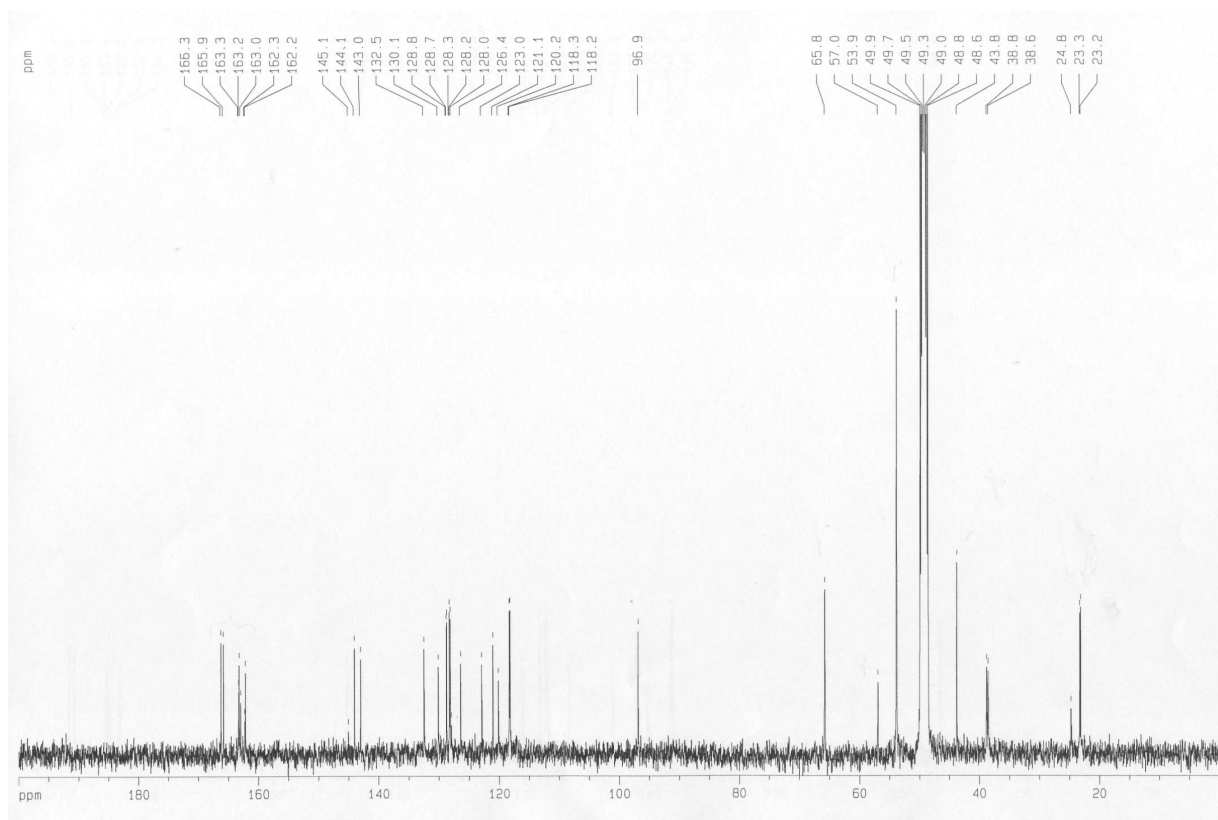

Supplement: jm5b01283_si_001.pdf [file jm5b01283_si_001.pdf]
